# Supplementary material for: Sesamoid bones in tuatara (Sphenodon punctatus) investigated with X‐ray microtomography, and implications for sesamoid evolution in Lepidosauria
Source: PubMed Central journal article supplement — J Morphol. 2016 Nov 24;278(1):62–72. doi: 10.1002/jmor.20619 (PMC6680162; doi:10.1002/jmor.20619), 2016-11-24

Parsimony ancestral state reconstructions of sesamoids and lunulae, using MESQUITE version 3.10

Reconstructions over the morphology-based strict consensus tree of Gauthier et al. (2012)

Character: Basipterygoid-pterygoid sesamoid

Parsimony reconstruction

□ 0 absent  
■ 1 present

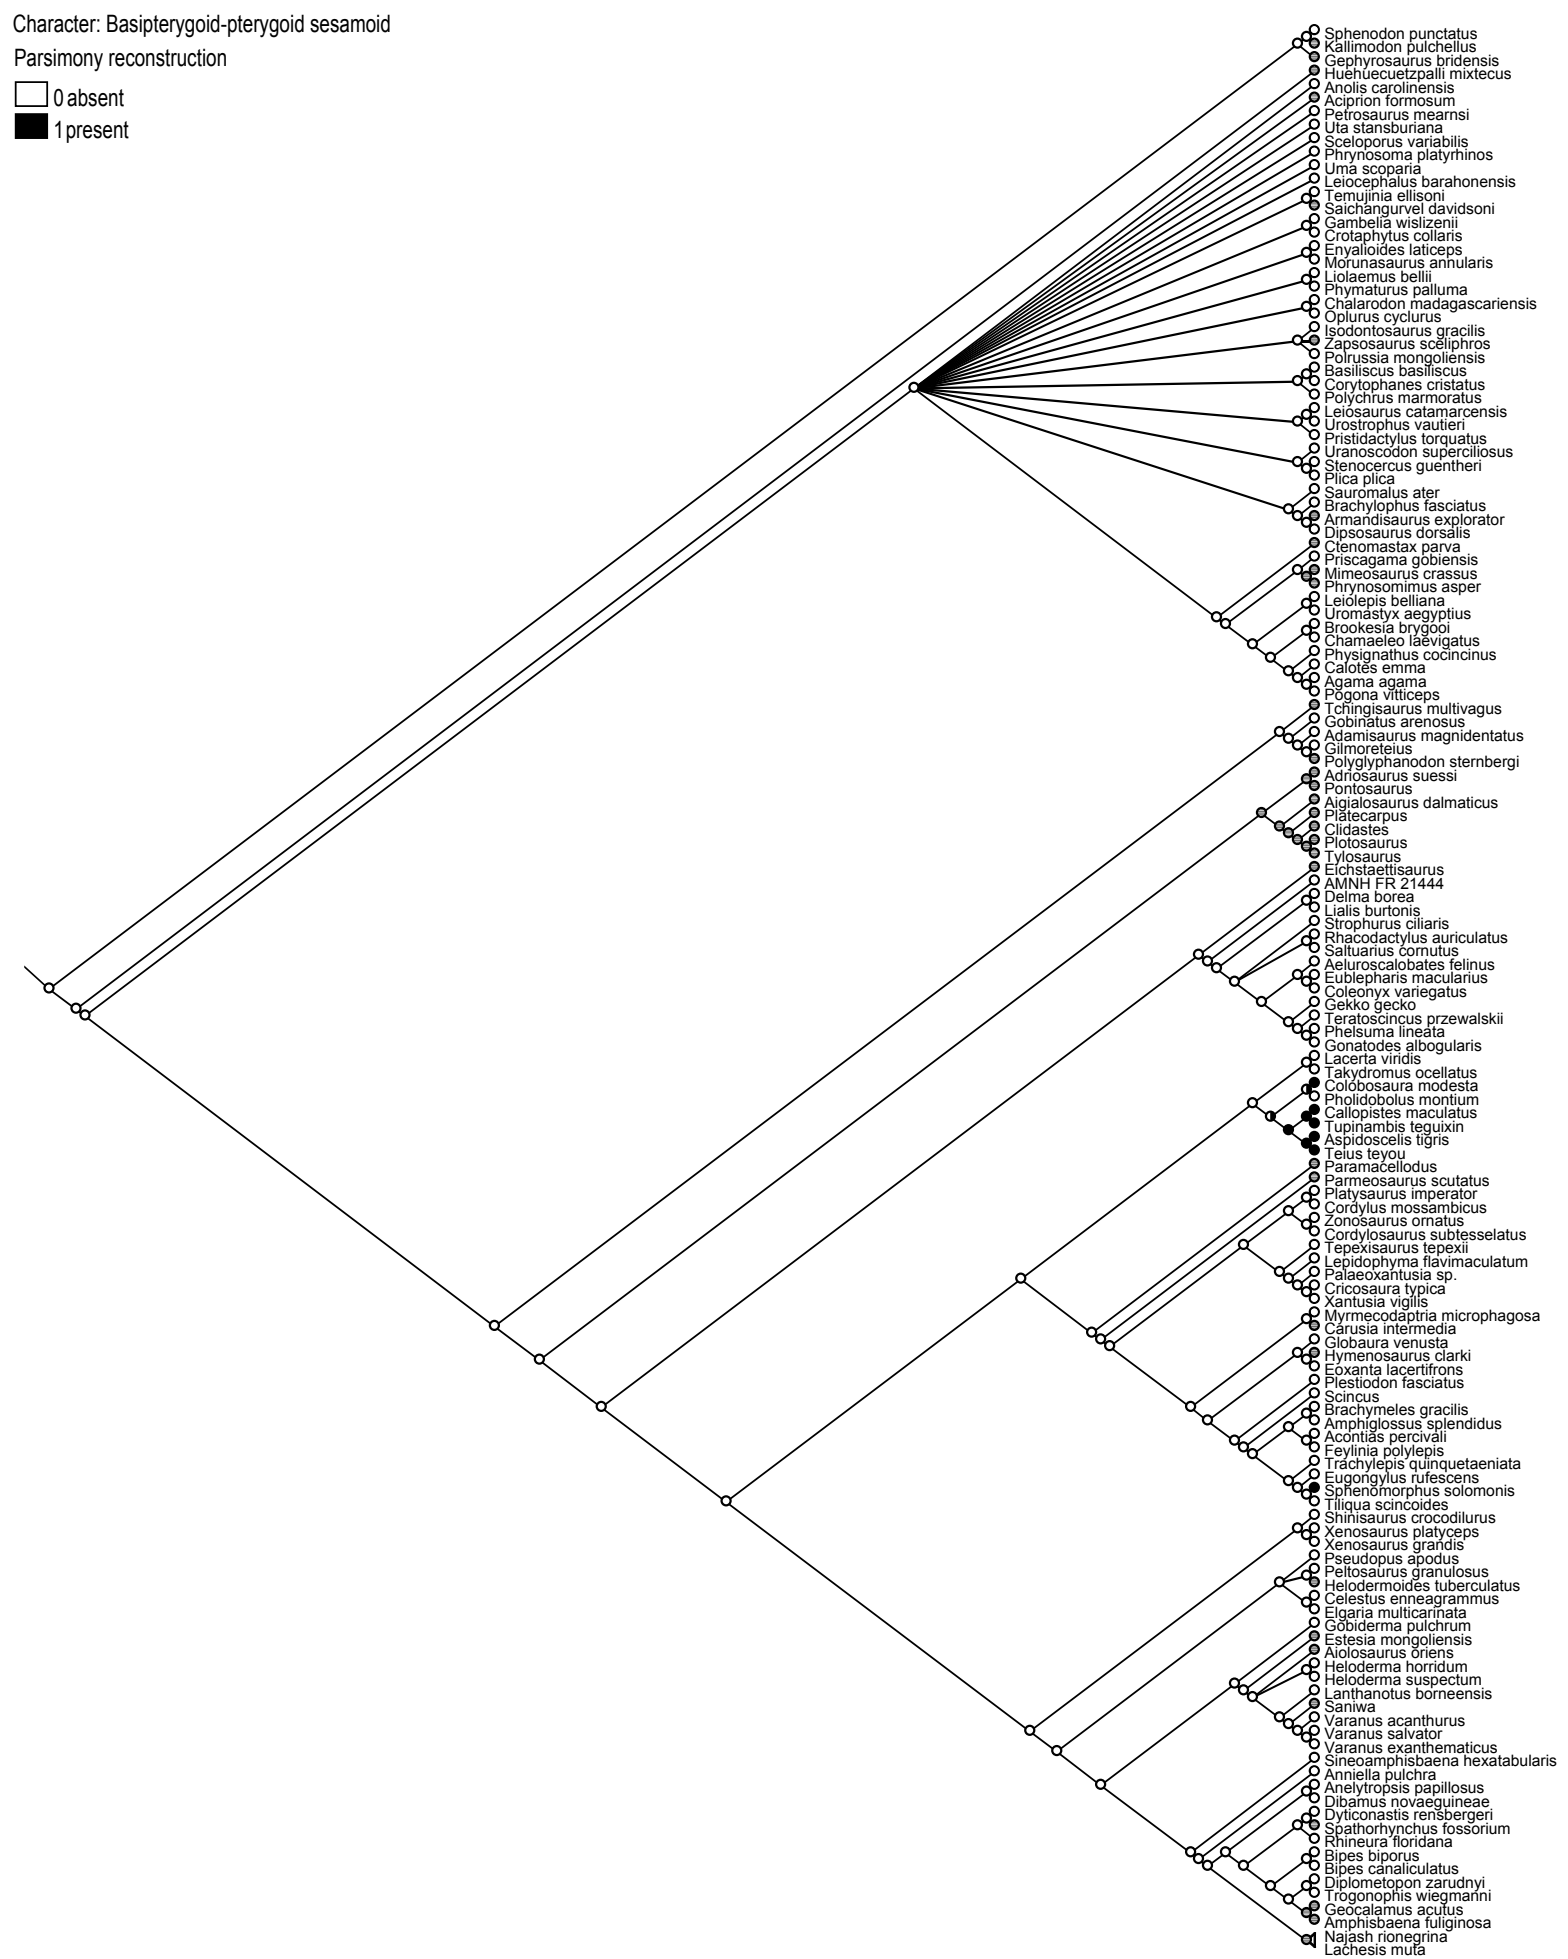

Character: Ulnar patella  
Parsimony reconstruction

0 present  
1 absent

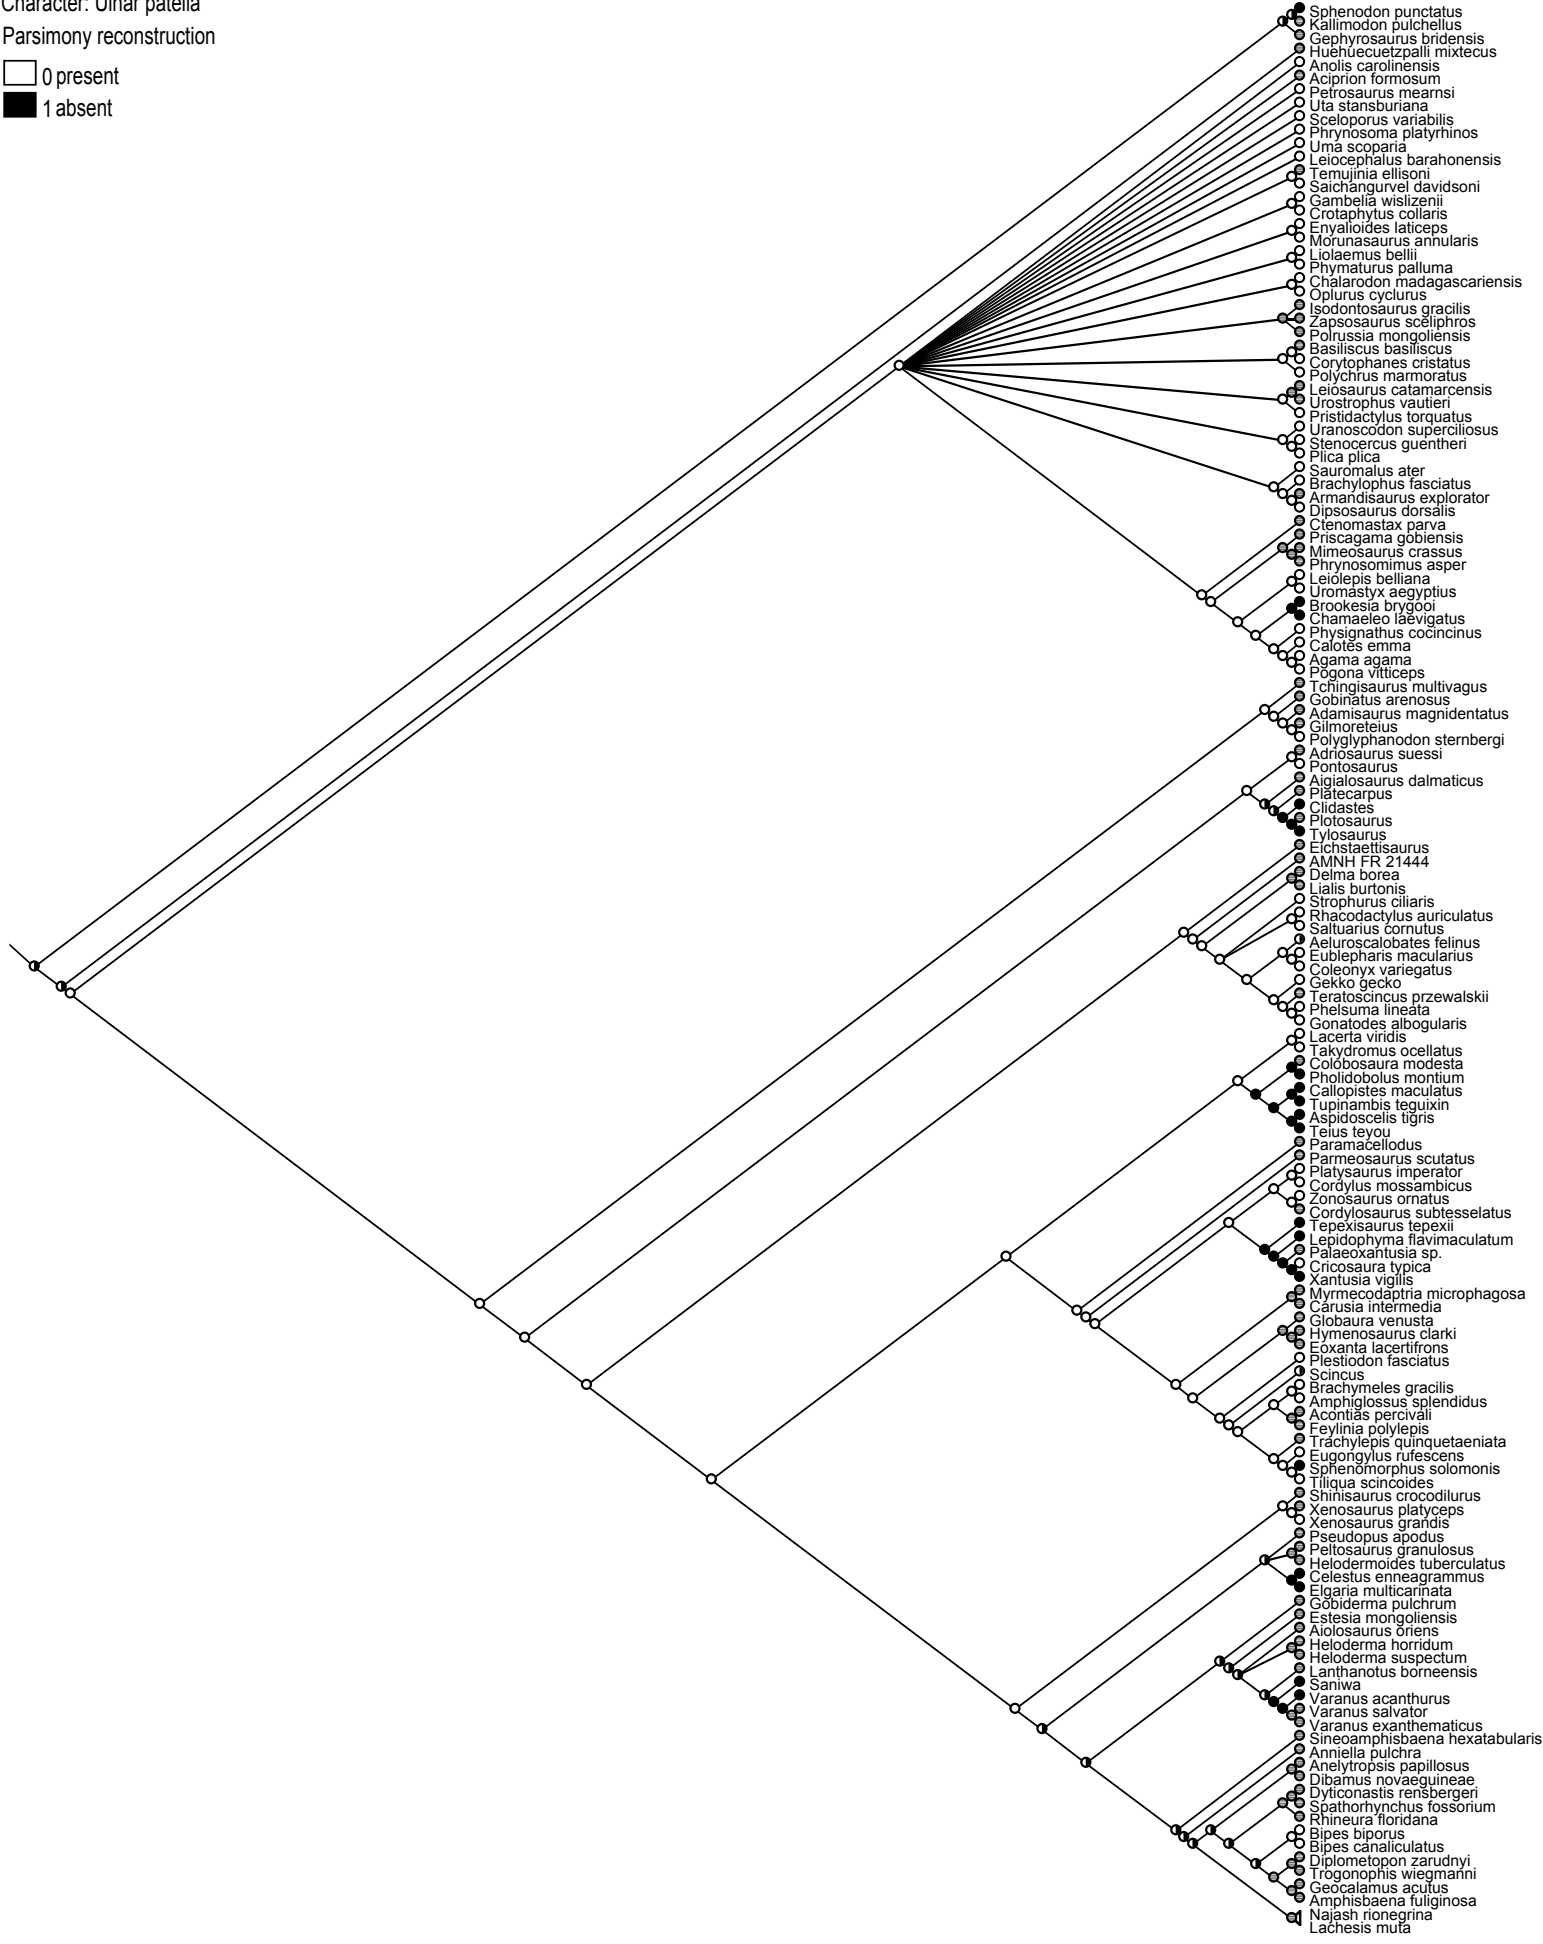

Character: Palmar sesamoids

Parsimony reconstruction

0 absent  
1 present

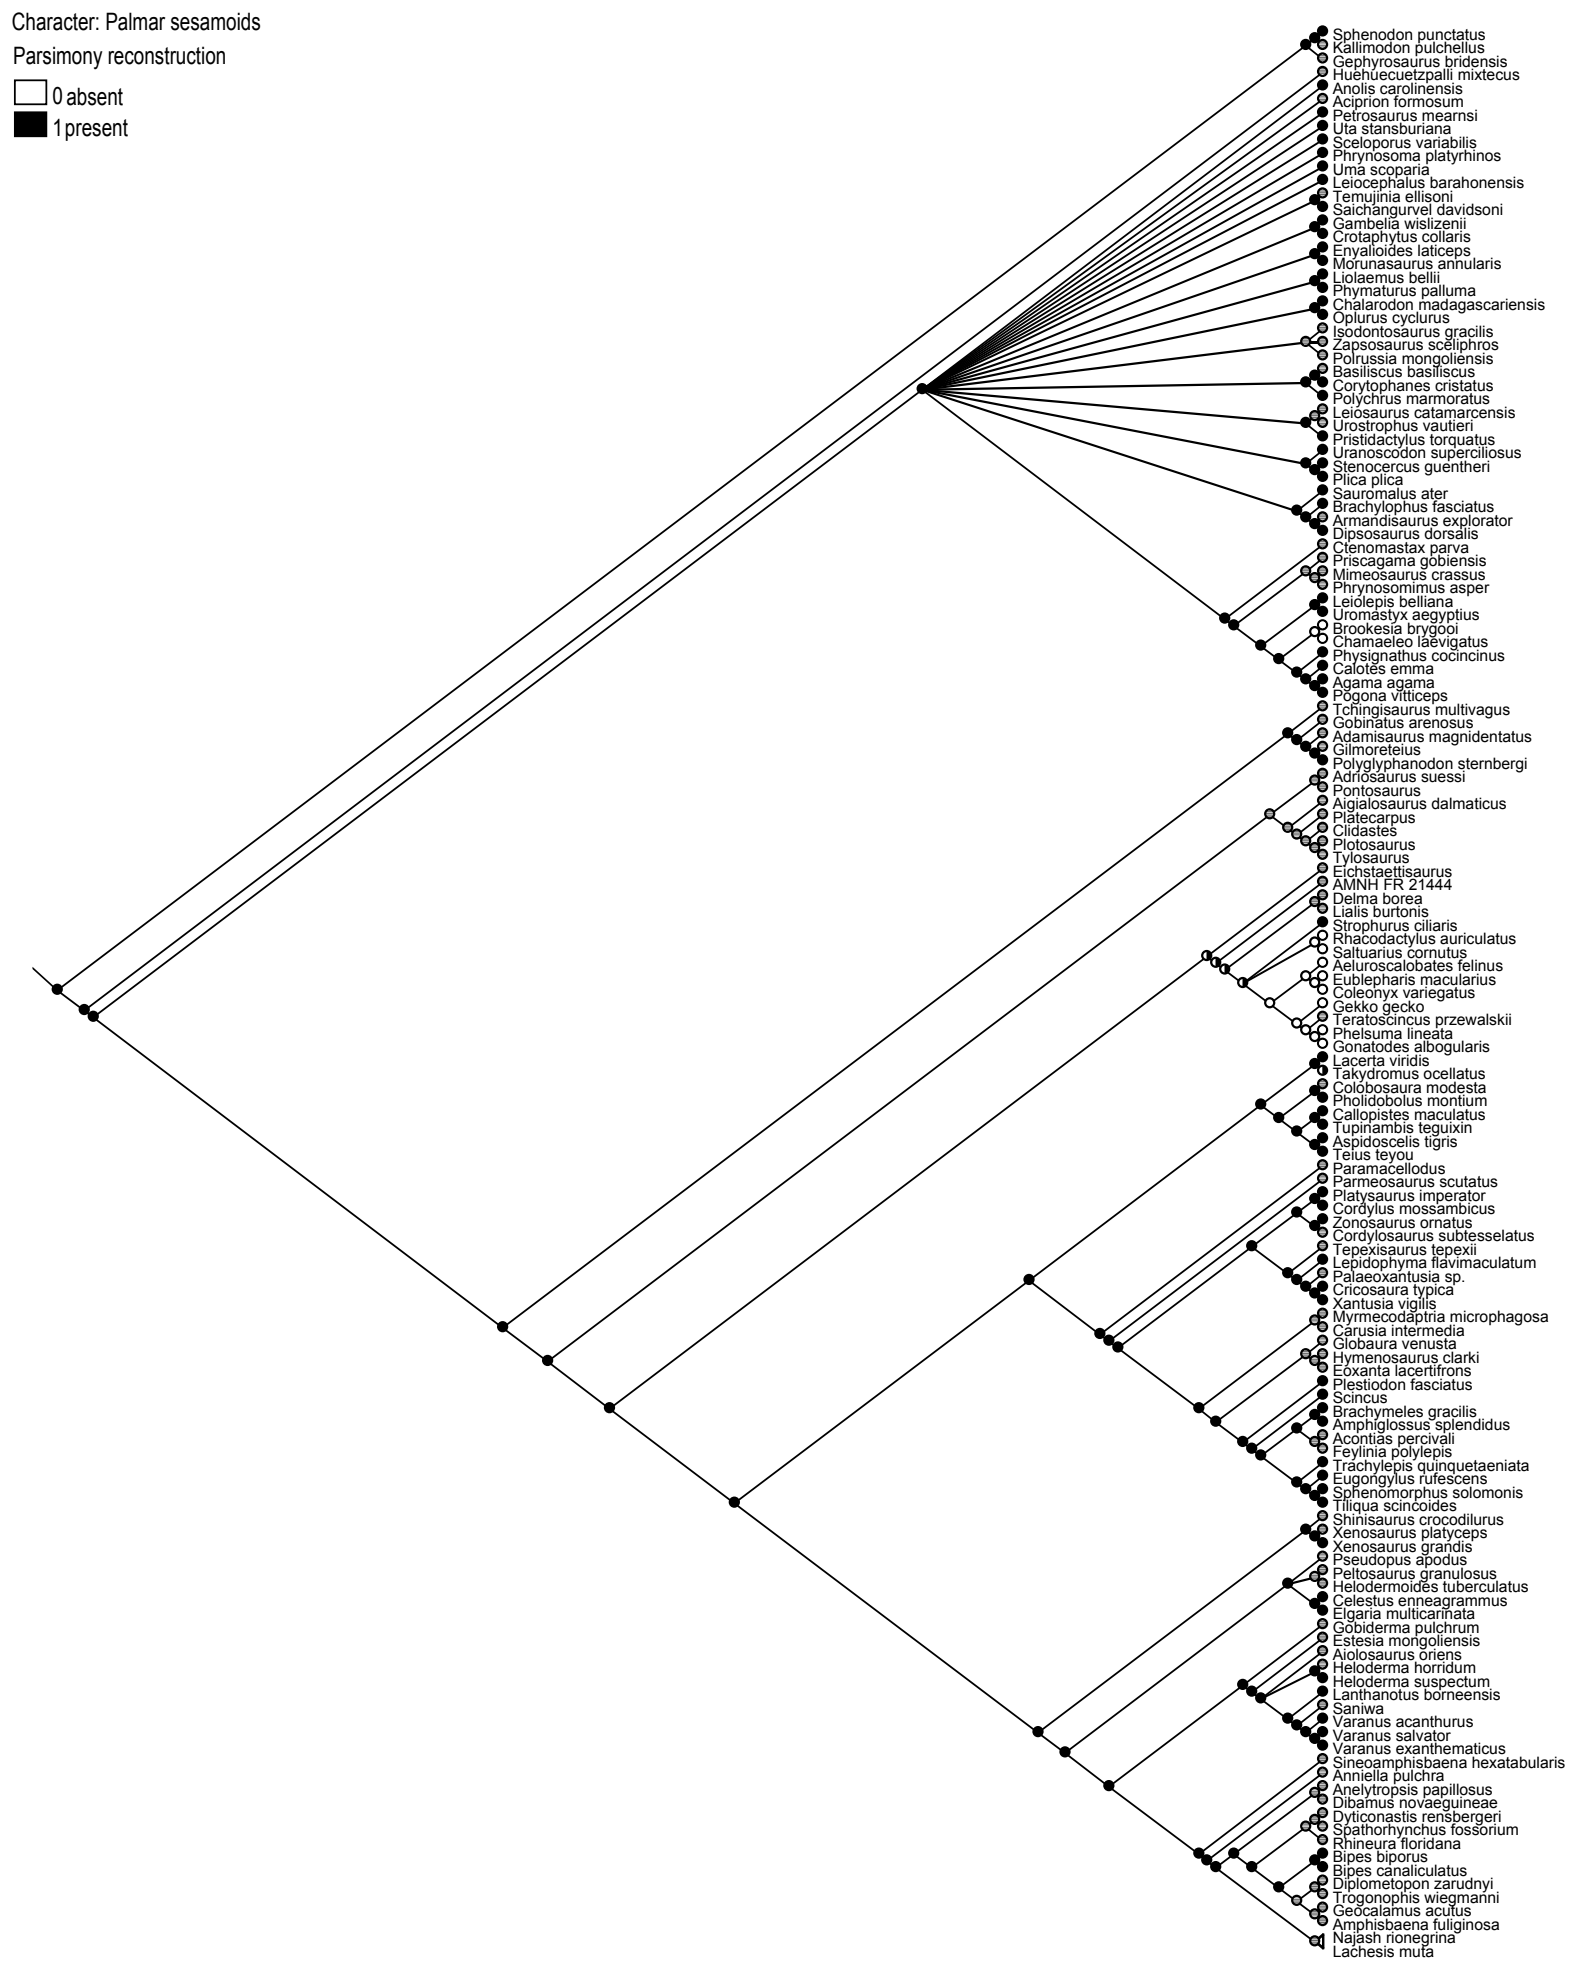

Character: Metacarpal sesamoids

Parsimony reconstruction

□ 0 absent  
■ 1 present

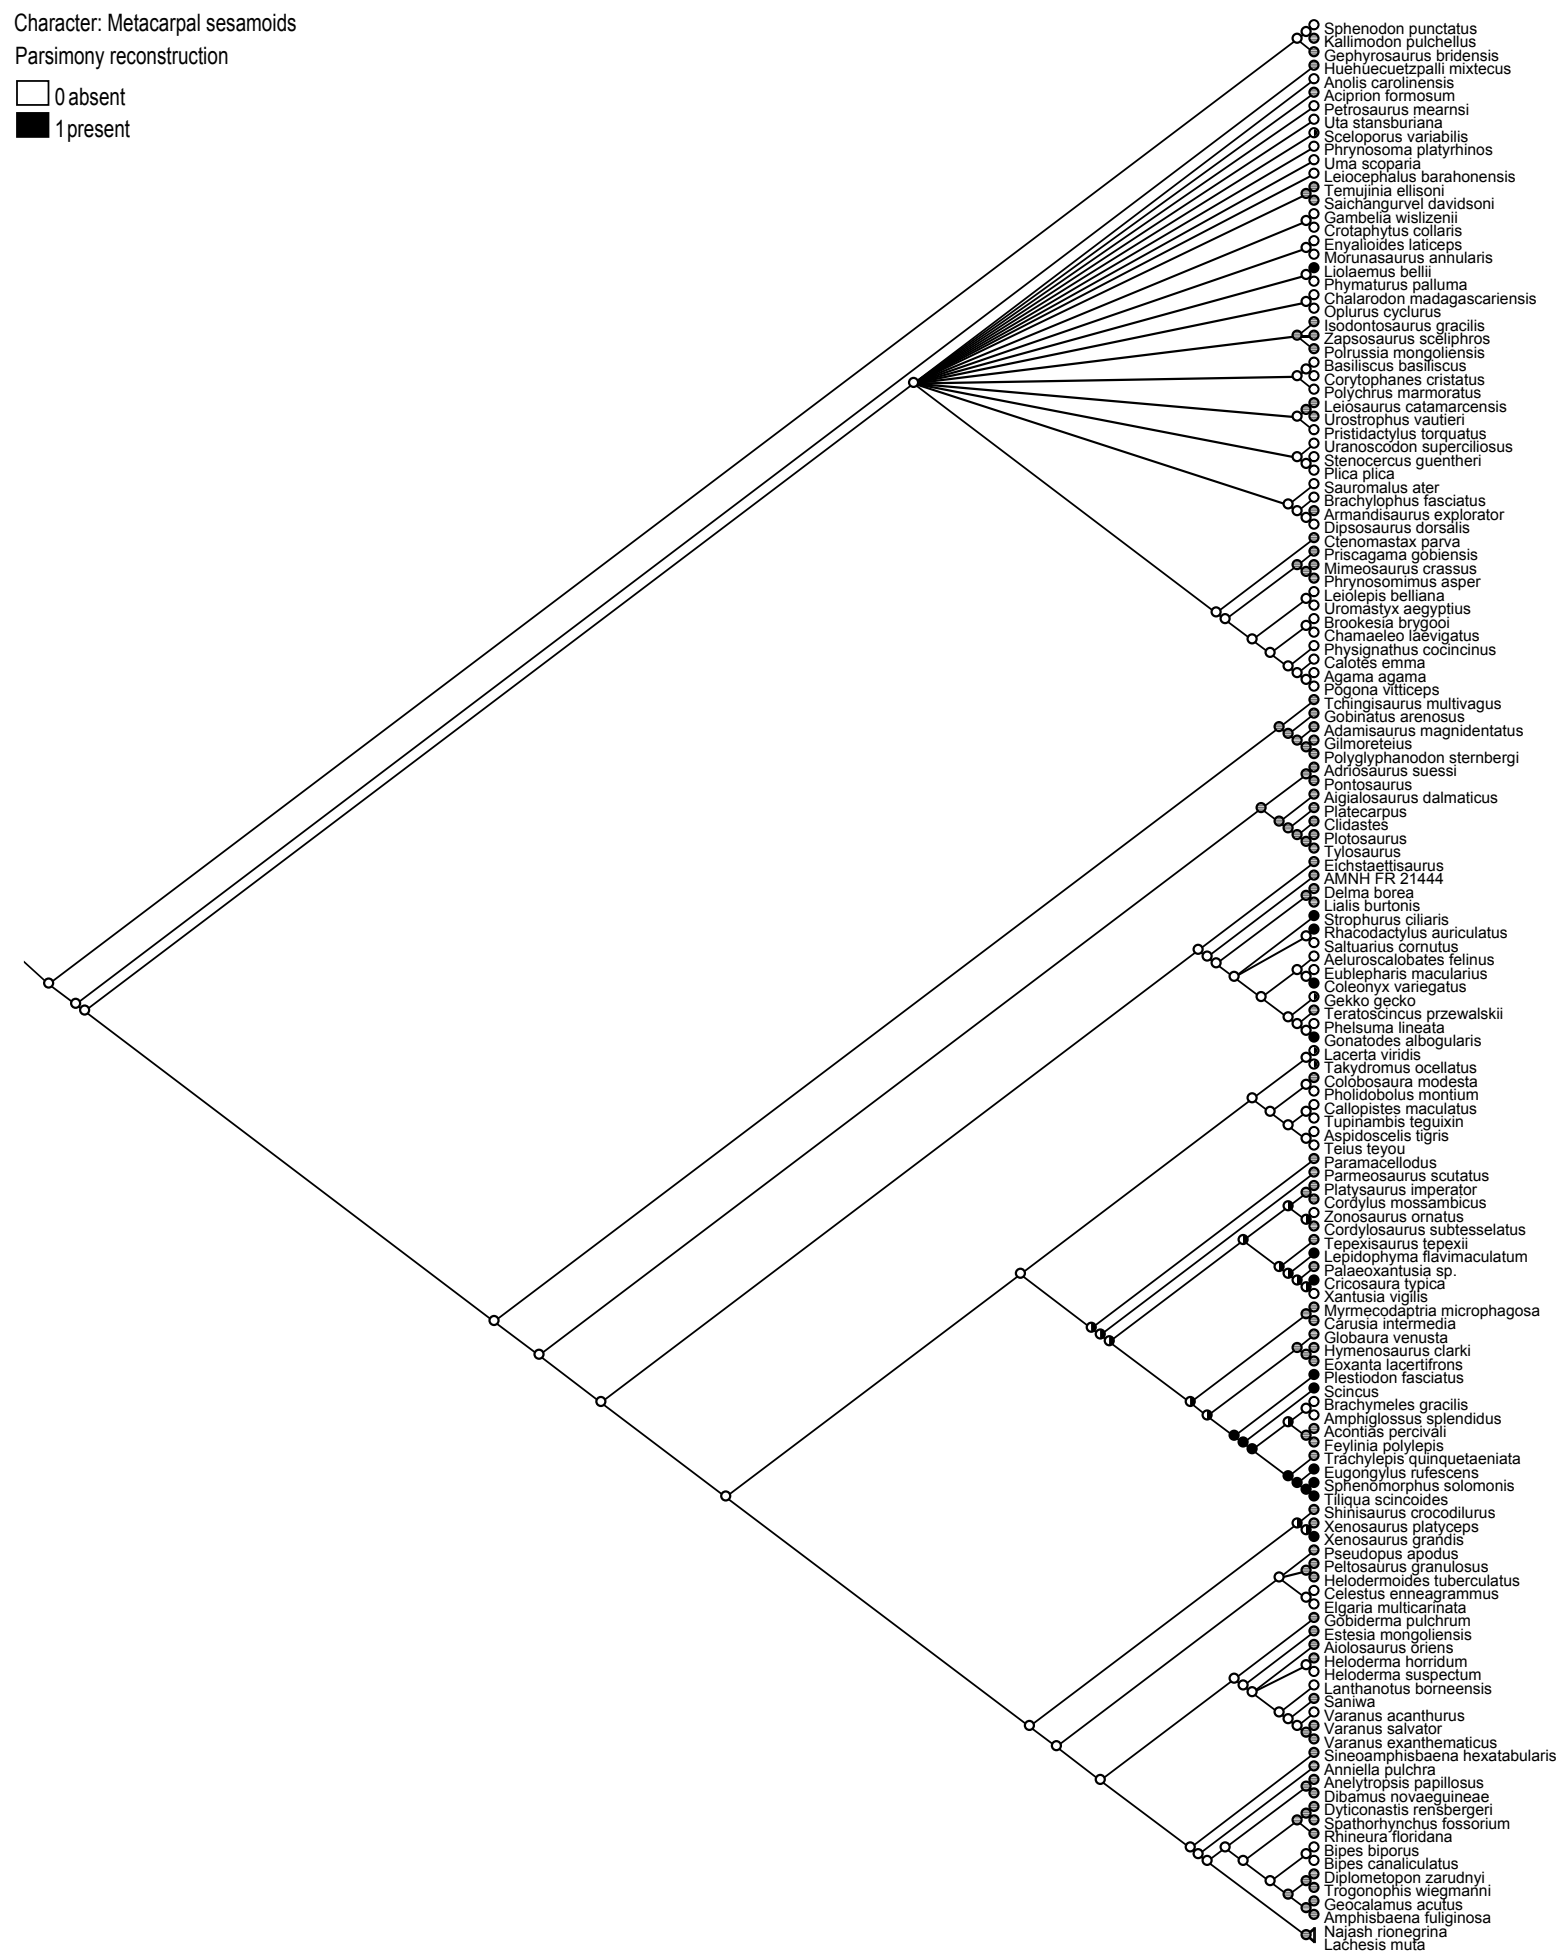

Character: Distal phalangeal sesamoids (manus)

Parsimony reconstruction

□ 0 present  
■ 1 absent

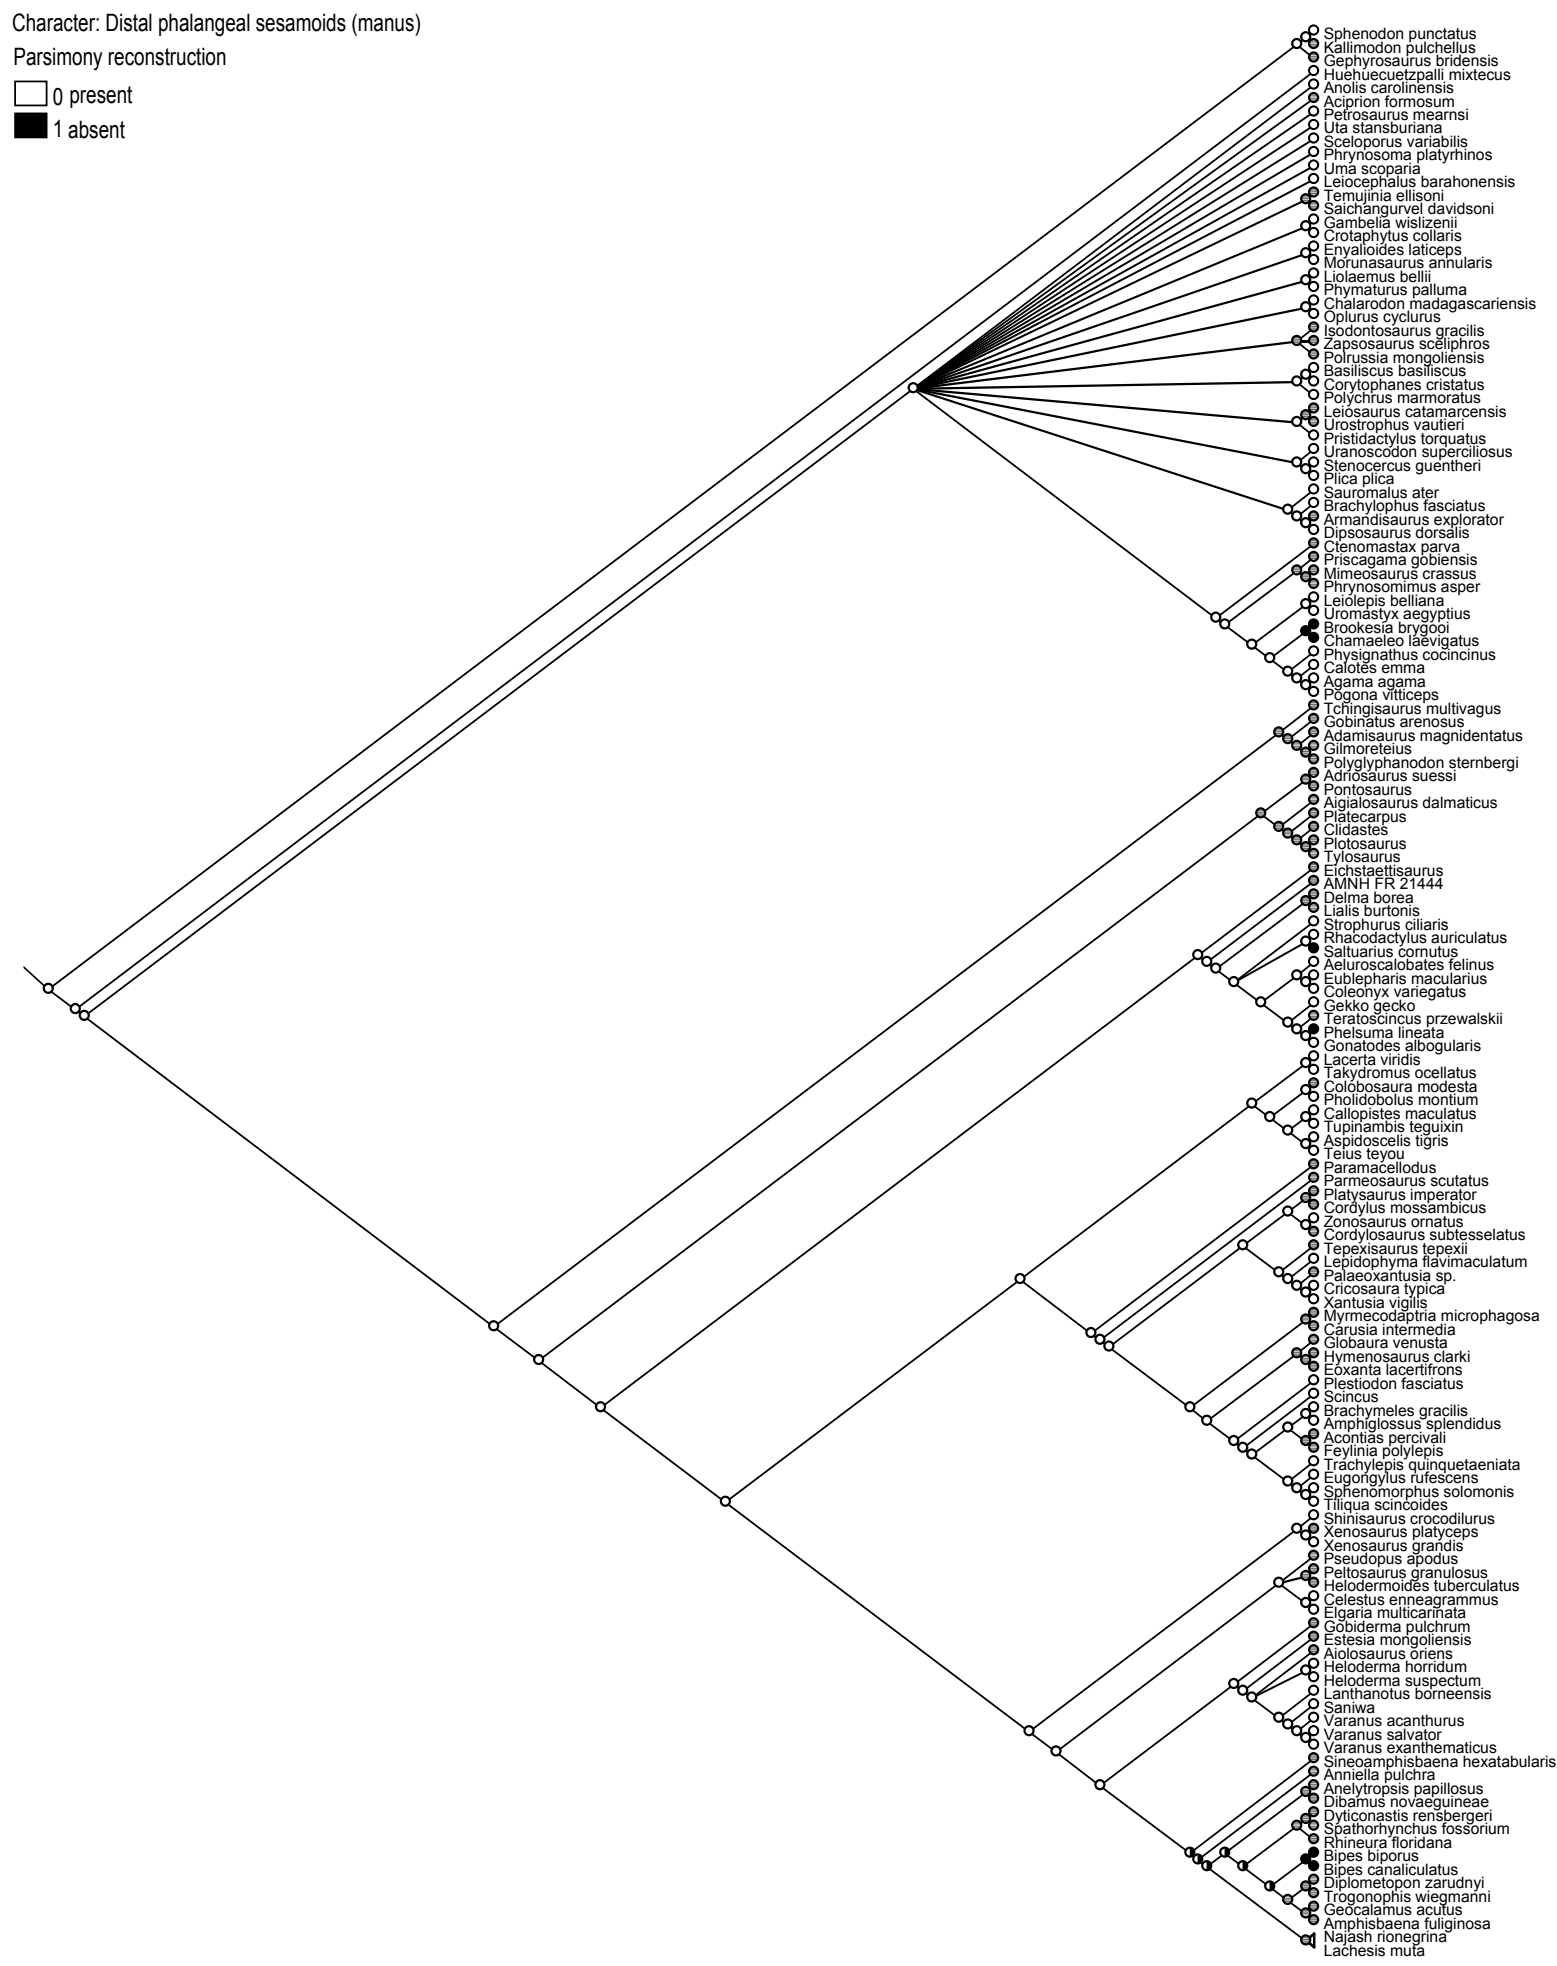

Character: Tibial patella  
Parsimony reconstruction

□ 0 present  
■ 1 absent

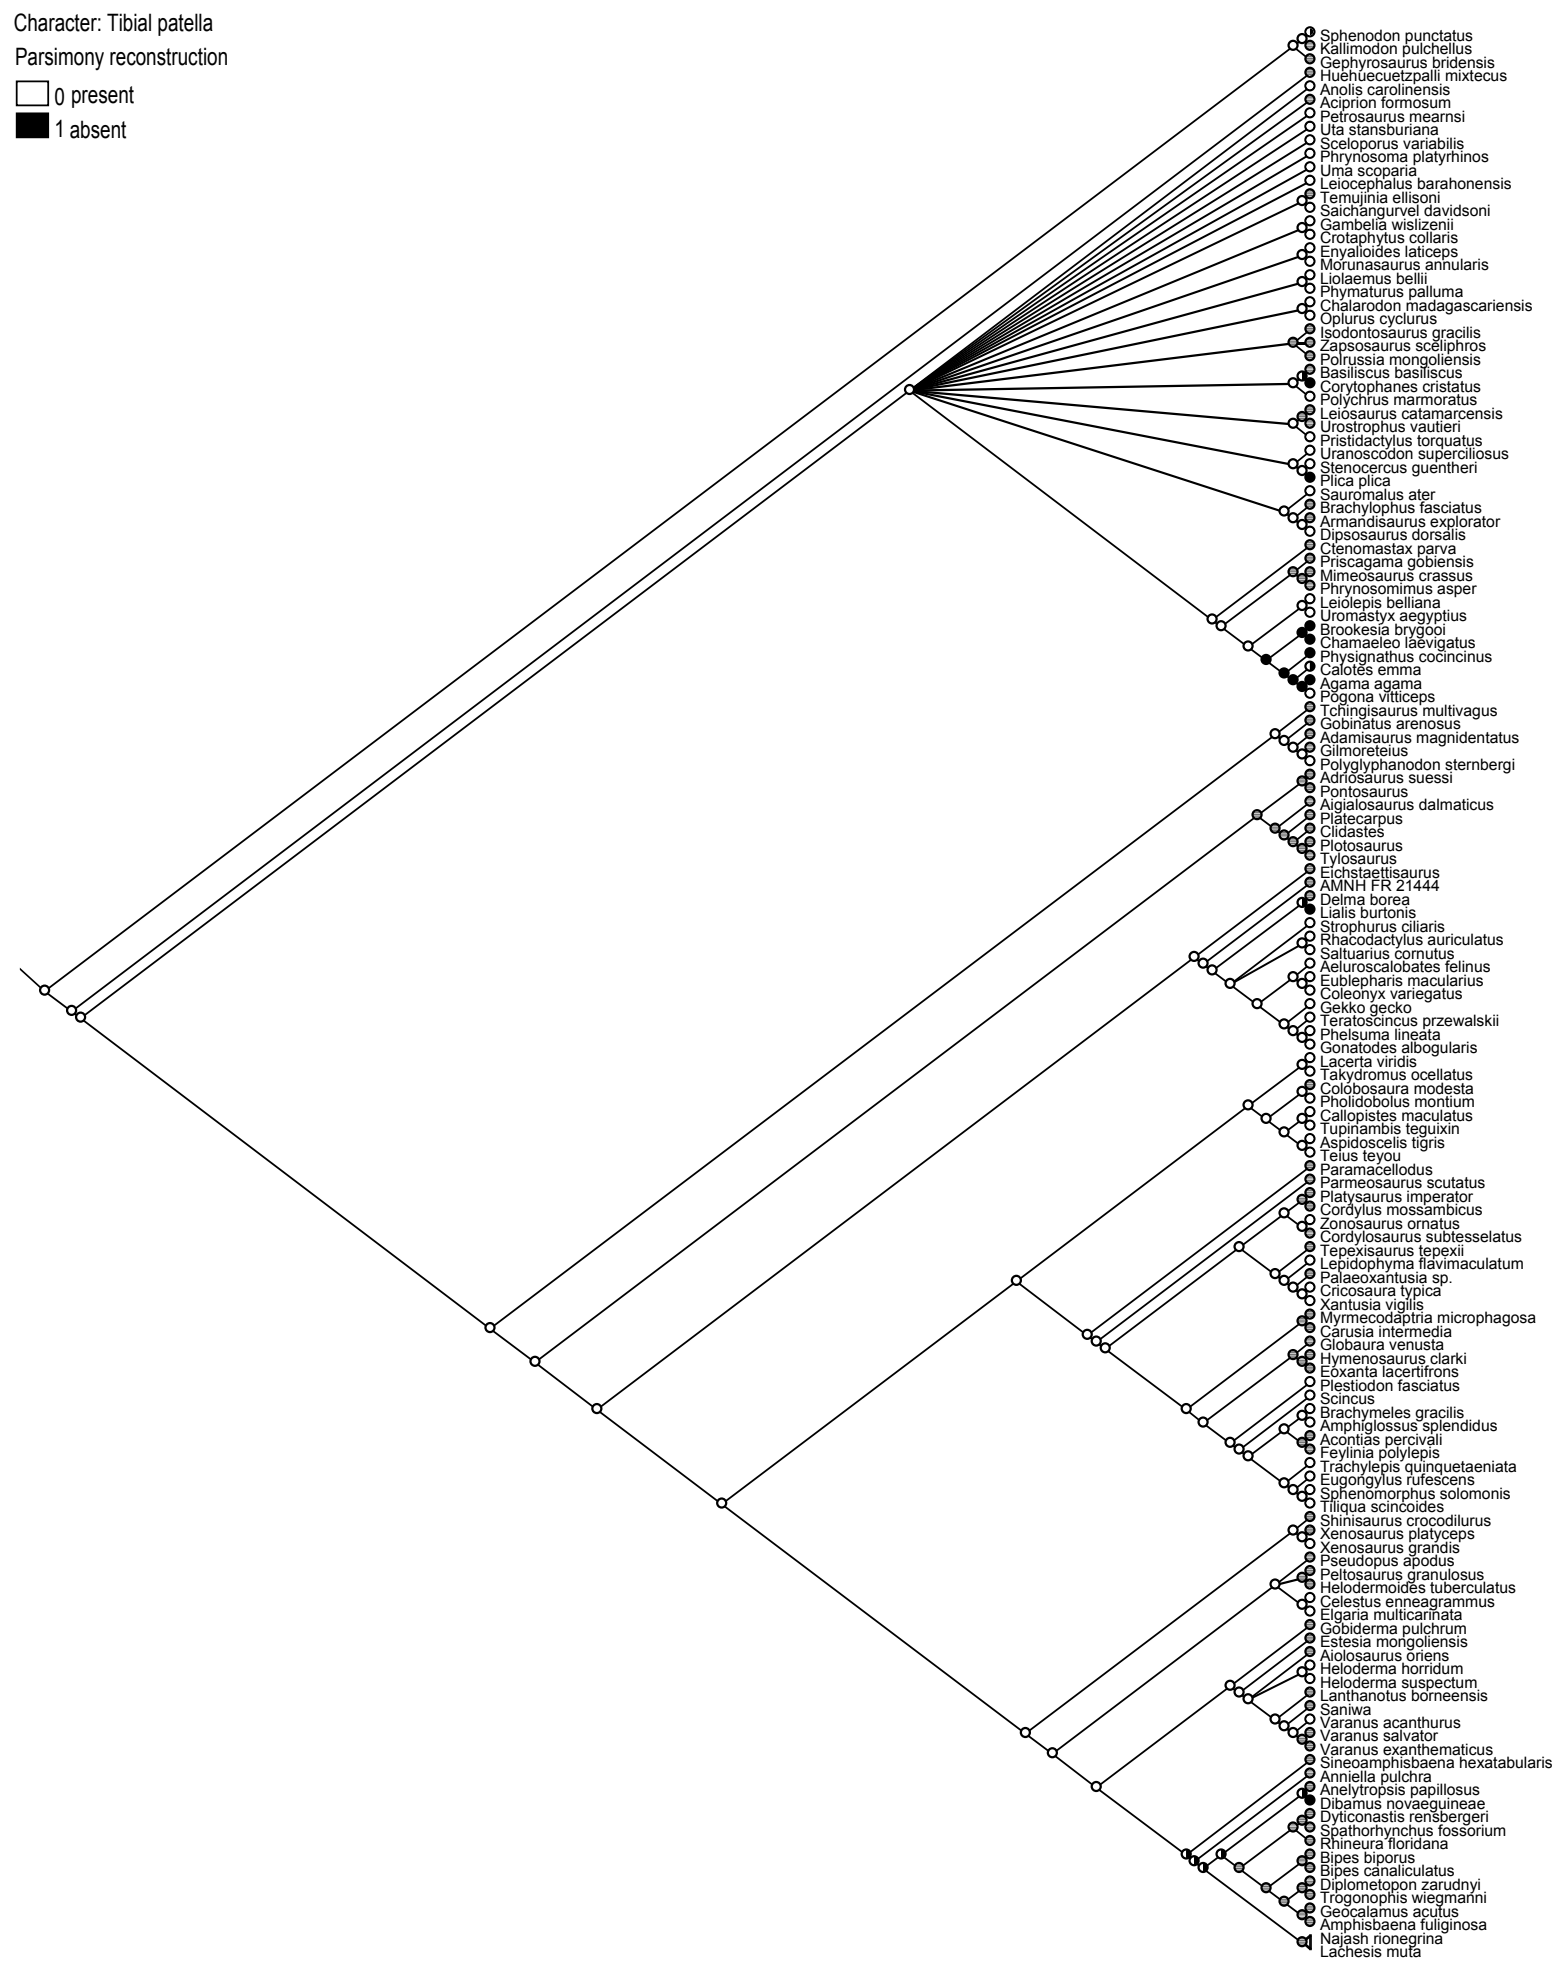

Character: Tibial lunula  
Parsimony reconstruction

□ 0 present  
■ 1 absent

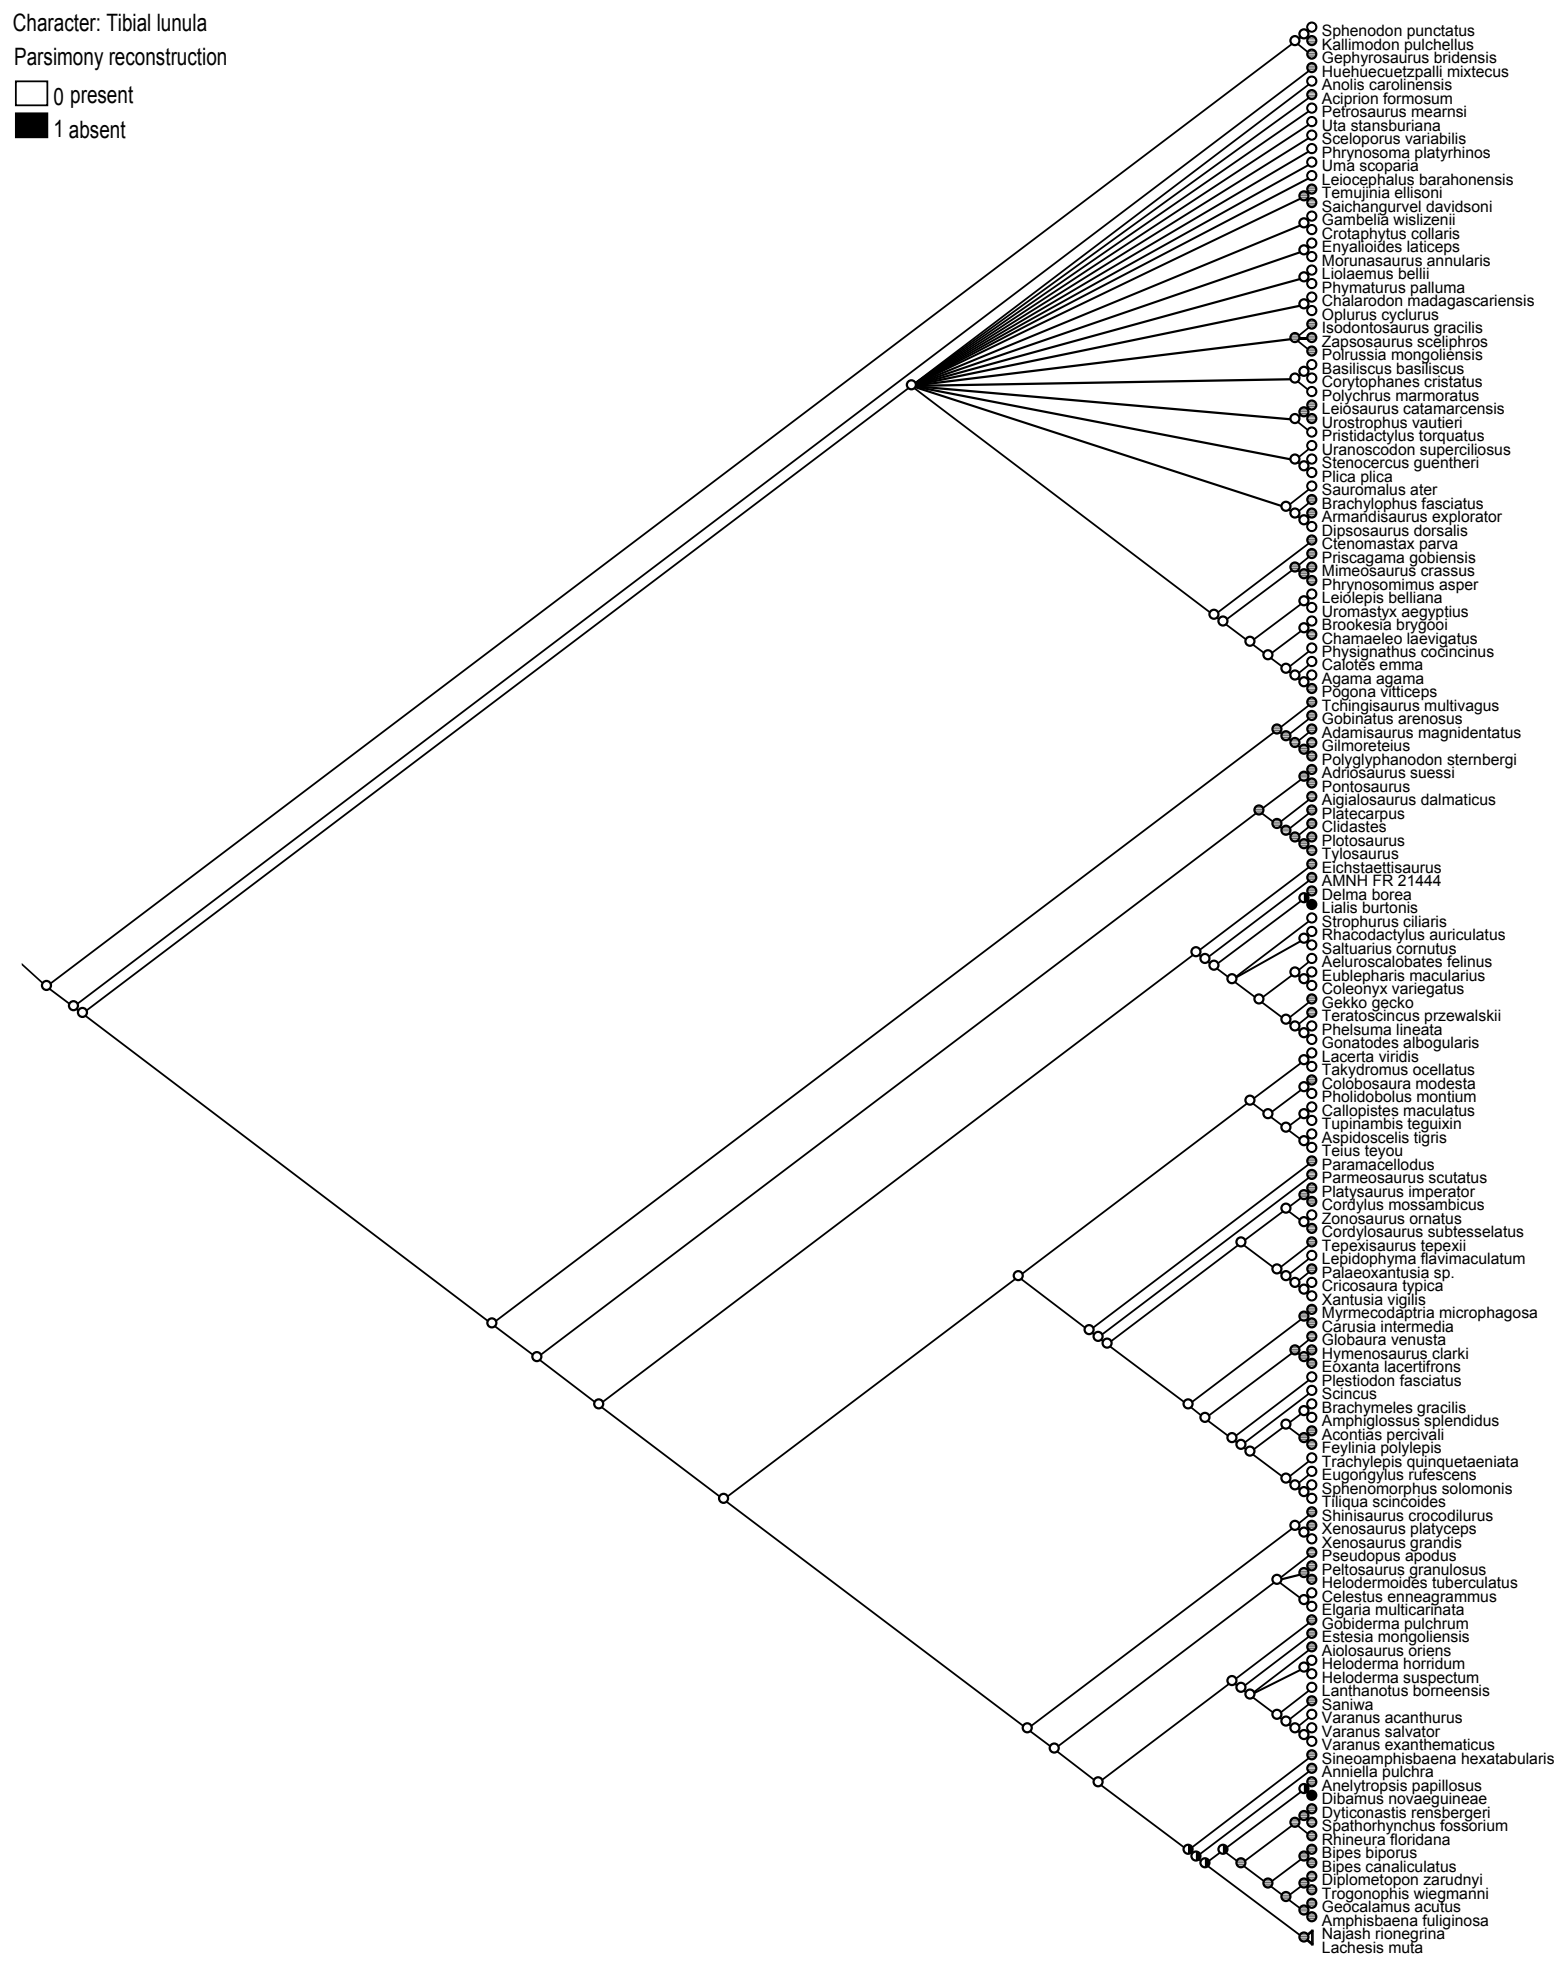





Character: Tibiofemoral lunulae

- Parsimony reconstruction
- 0 both present and separate
  - 1 ventral only
  - 2 absent
  - 3 both present and fused
  - 4 dorsal only

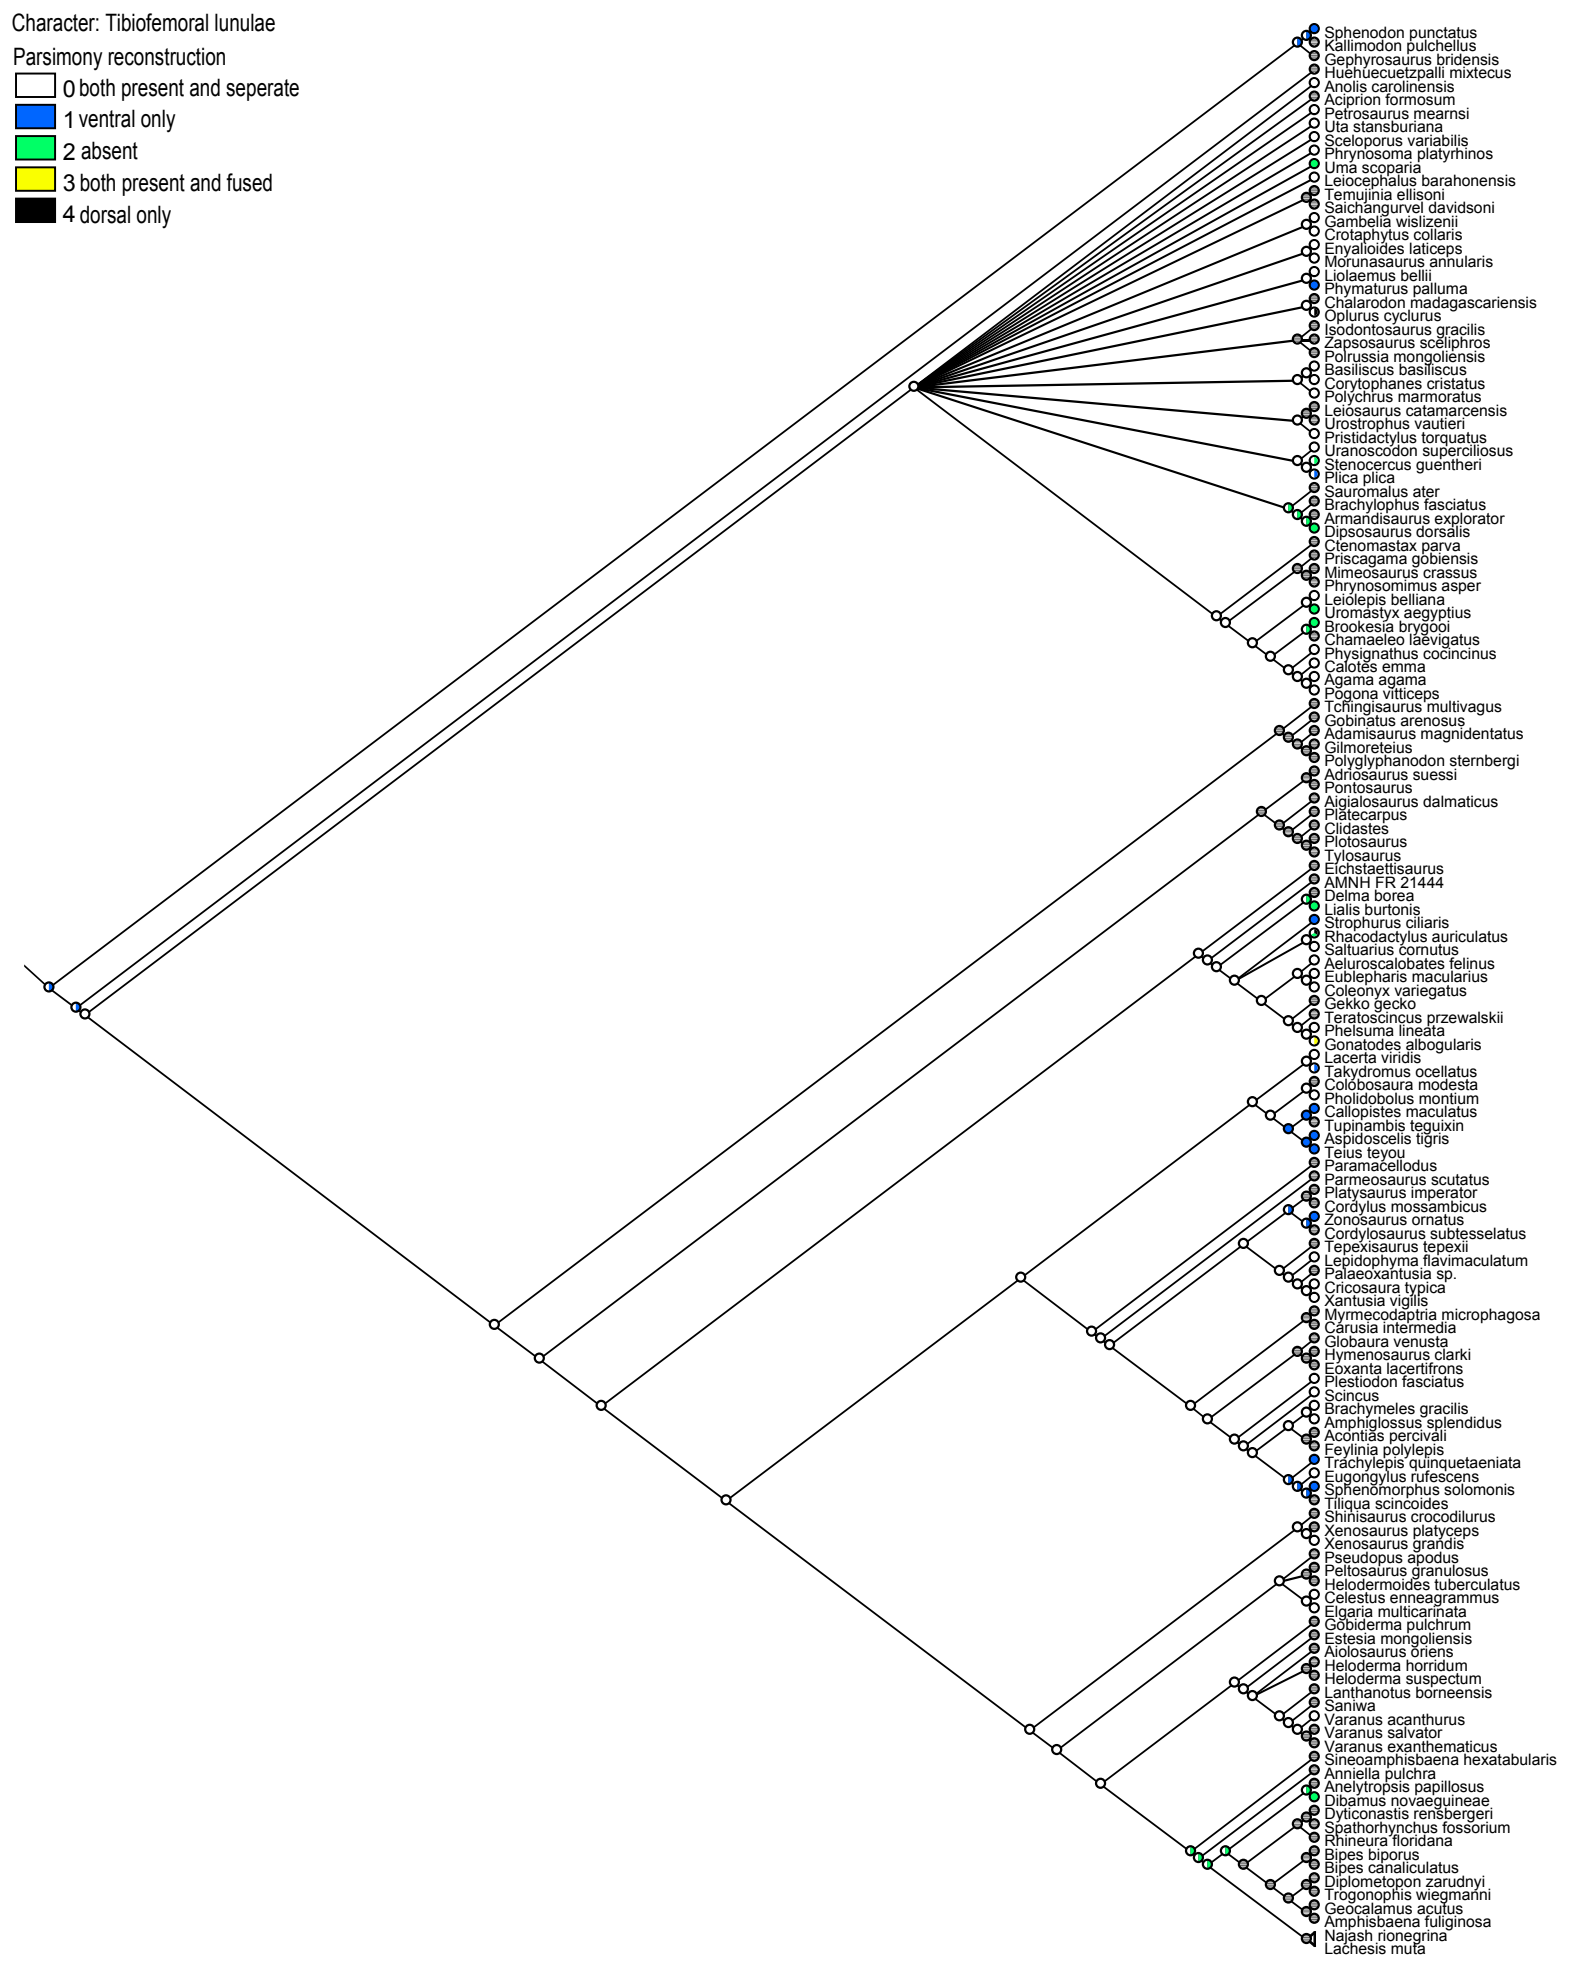

Character: AC-MTI sesamoid

Parsimony reconstruction

◻ 0 present  
◼ 1 absent

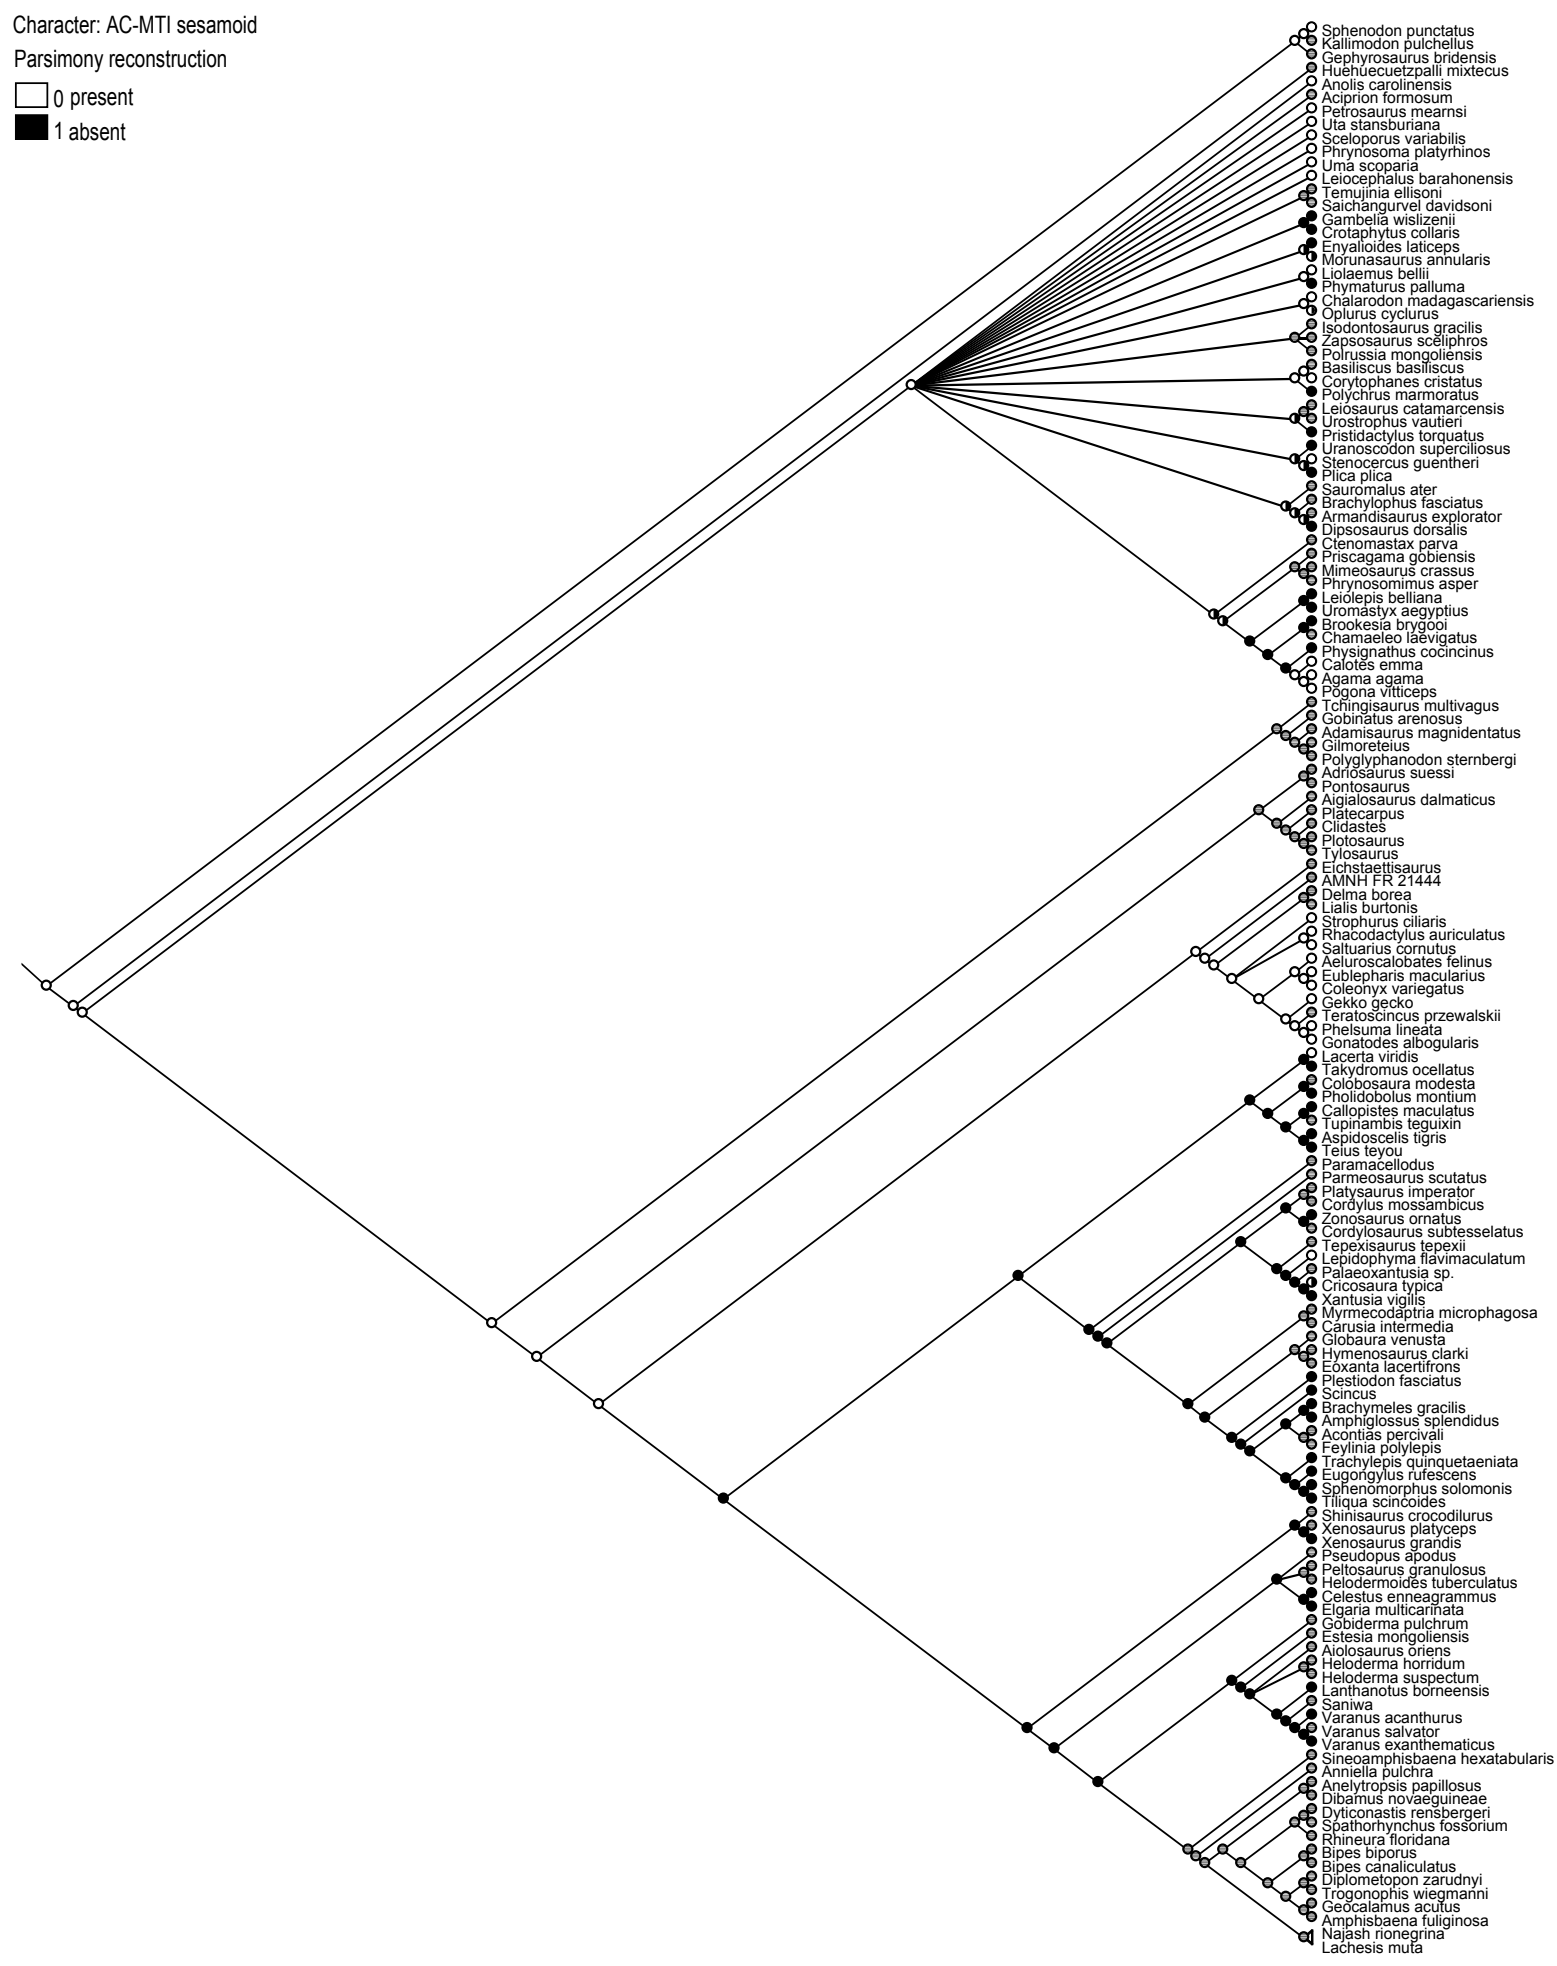

Character: Metatarsal sesamoids

Parsimony reconstruction

0 absent  
1 present

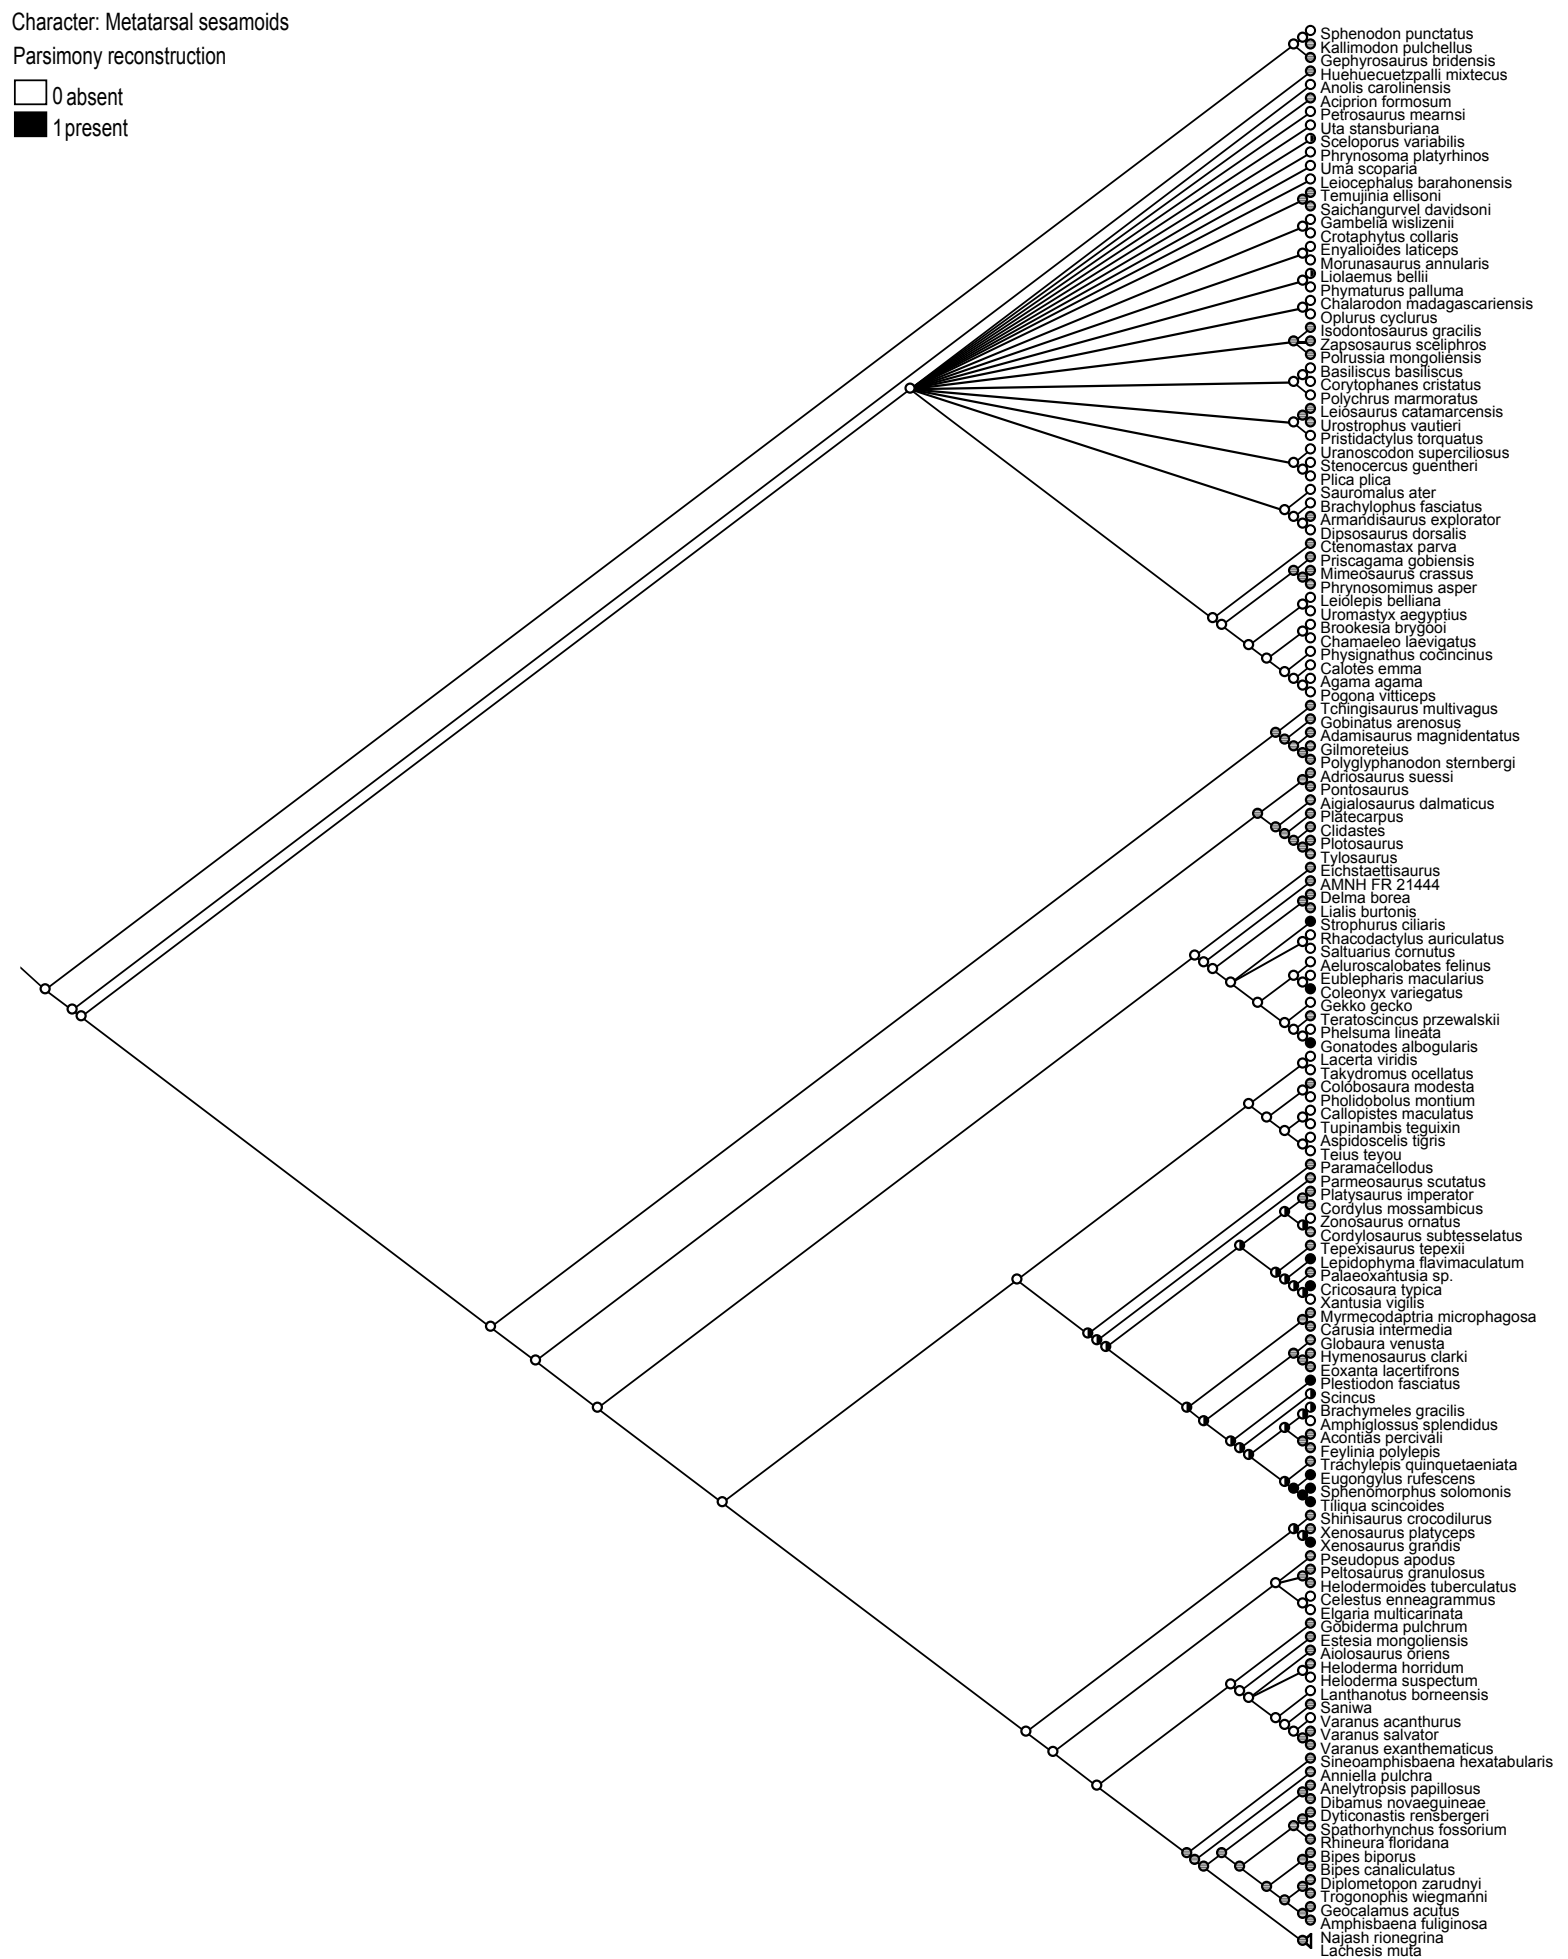

Character: Distal phalangeal sesamoids (pes)

Parsimony reconstruction

□ 0 present  
■ 1 absent

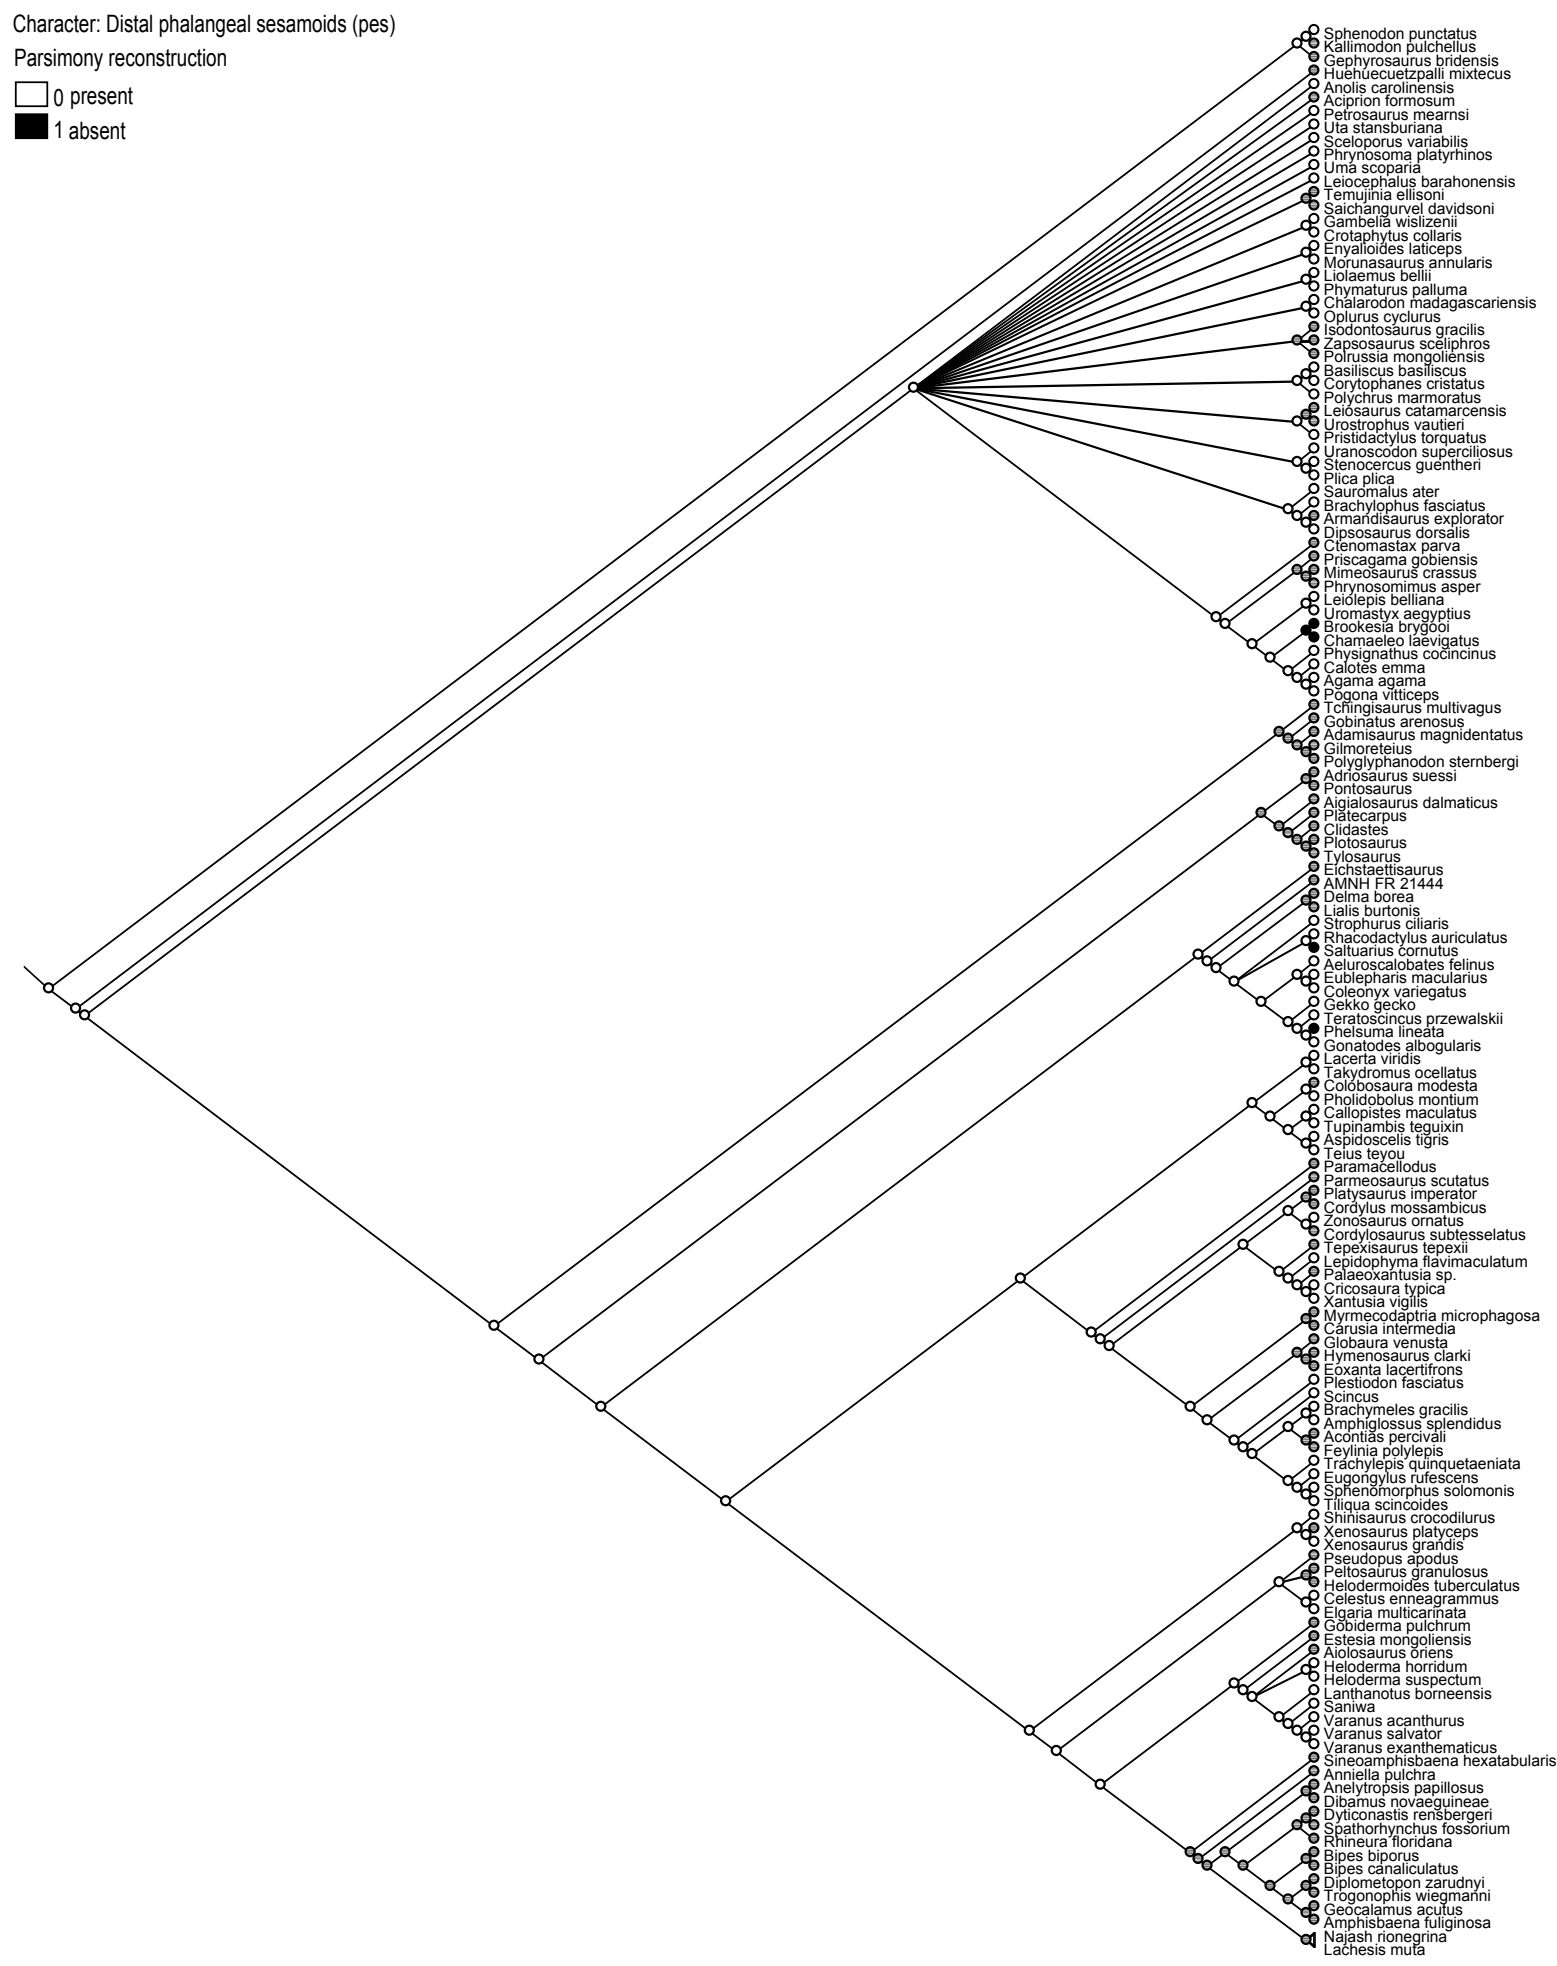

Supplement: JMOR-278-62-s001.pdf [file JMOR-278-62-s001.pdf]
