# Supplementary material for: Sesamoid bones in tuatara (Sphenodon punctatus) investigated with X‐ray microtomography, and implications for sesamoid evolution in Lepidosauria
Source: PubMed Central journal article supplement — J Morphol. 2016 Nov 24;278(1):62–72. doi: 10.1002/jmor.20619 (PMC6680162; doi:10.1002/jmor.20619), 2016-11-24

Maximum likelihood ancestral state reconstructions of sesamoids and lunulae, using  
MESQUITE version 3.10

Reconstructions over the molecular-based tree of Zheng and Wiens (2016)

Character: Basipterygoid-pterygoid sesamoid  
Maximum likelihood reconstruction

◻ 0 absent  
◼ 1 present

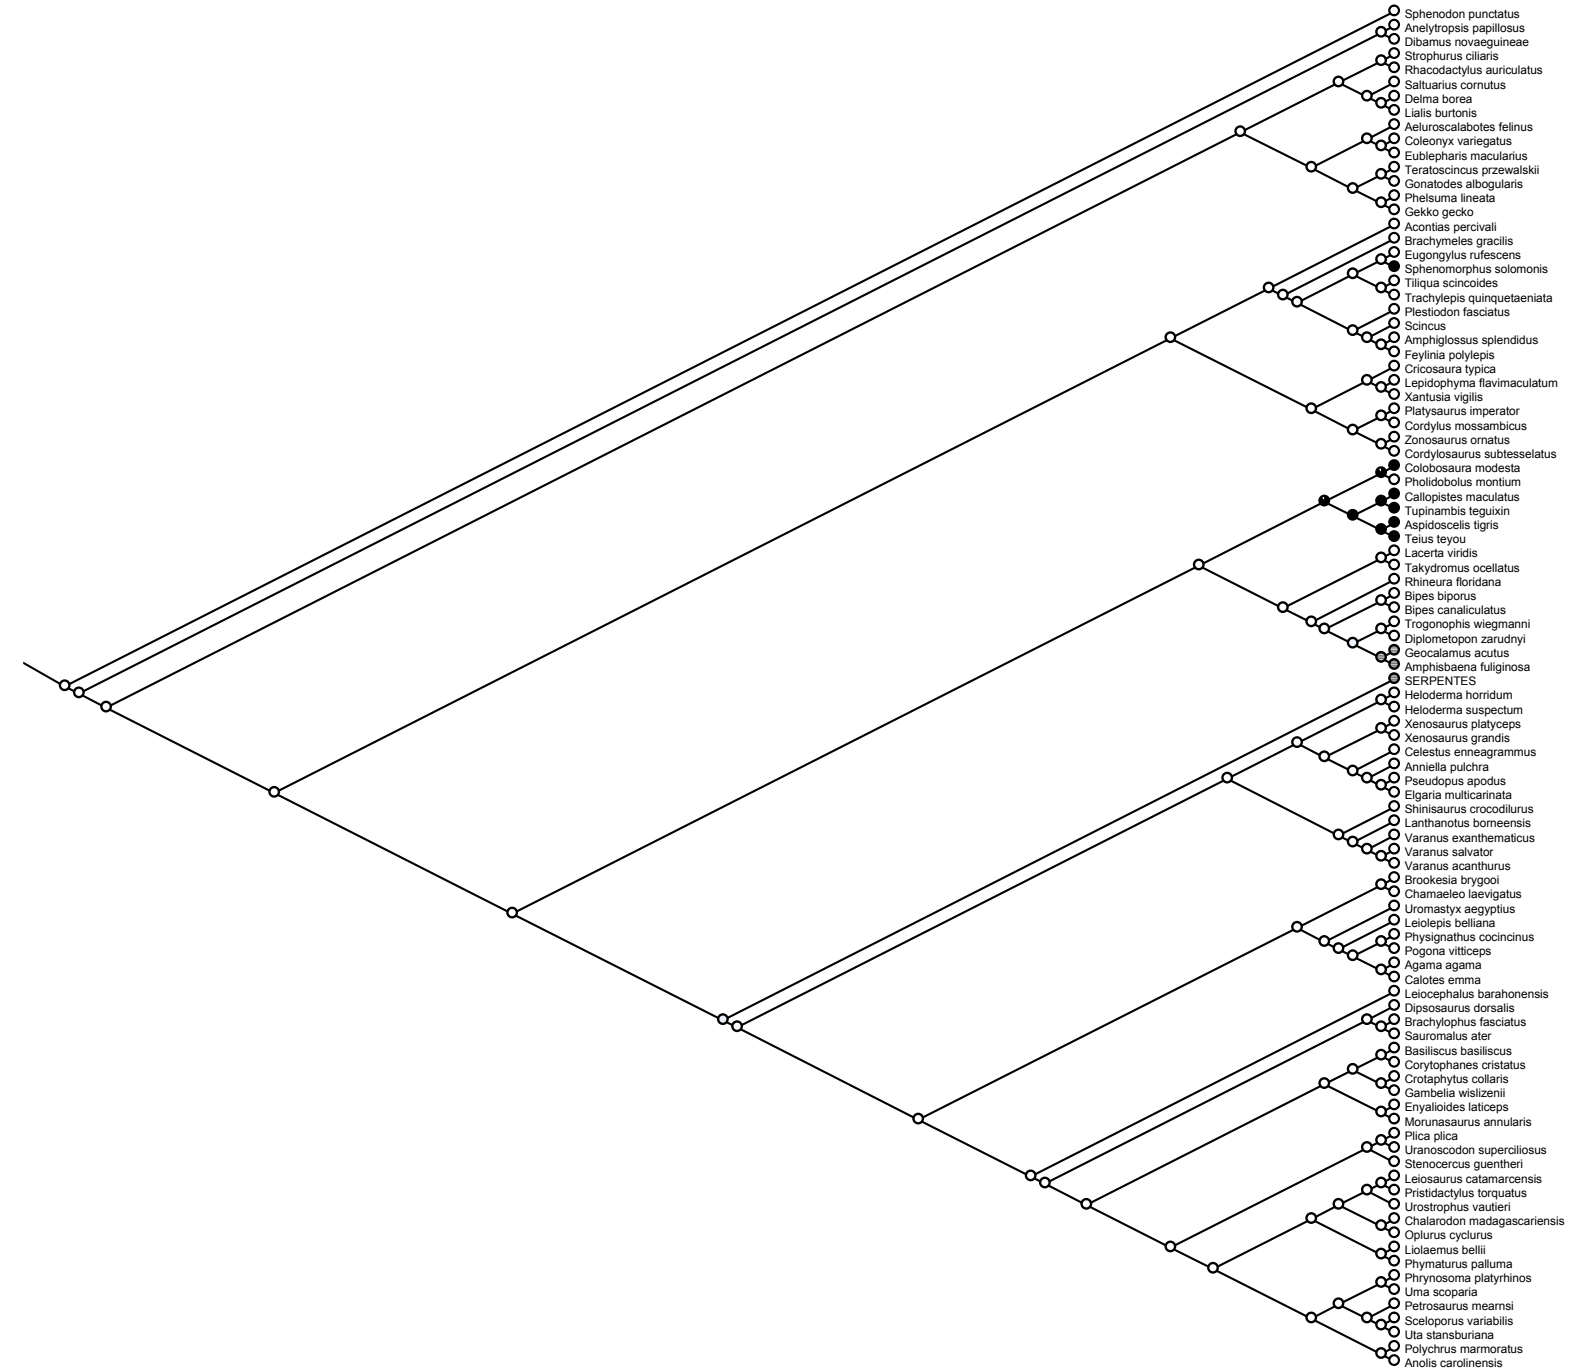

Character: Ulnar patella  
Maximum likelihood reconstruction

○ 0 present  
● 1 absent

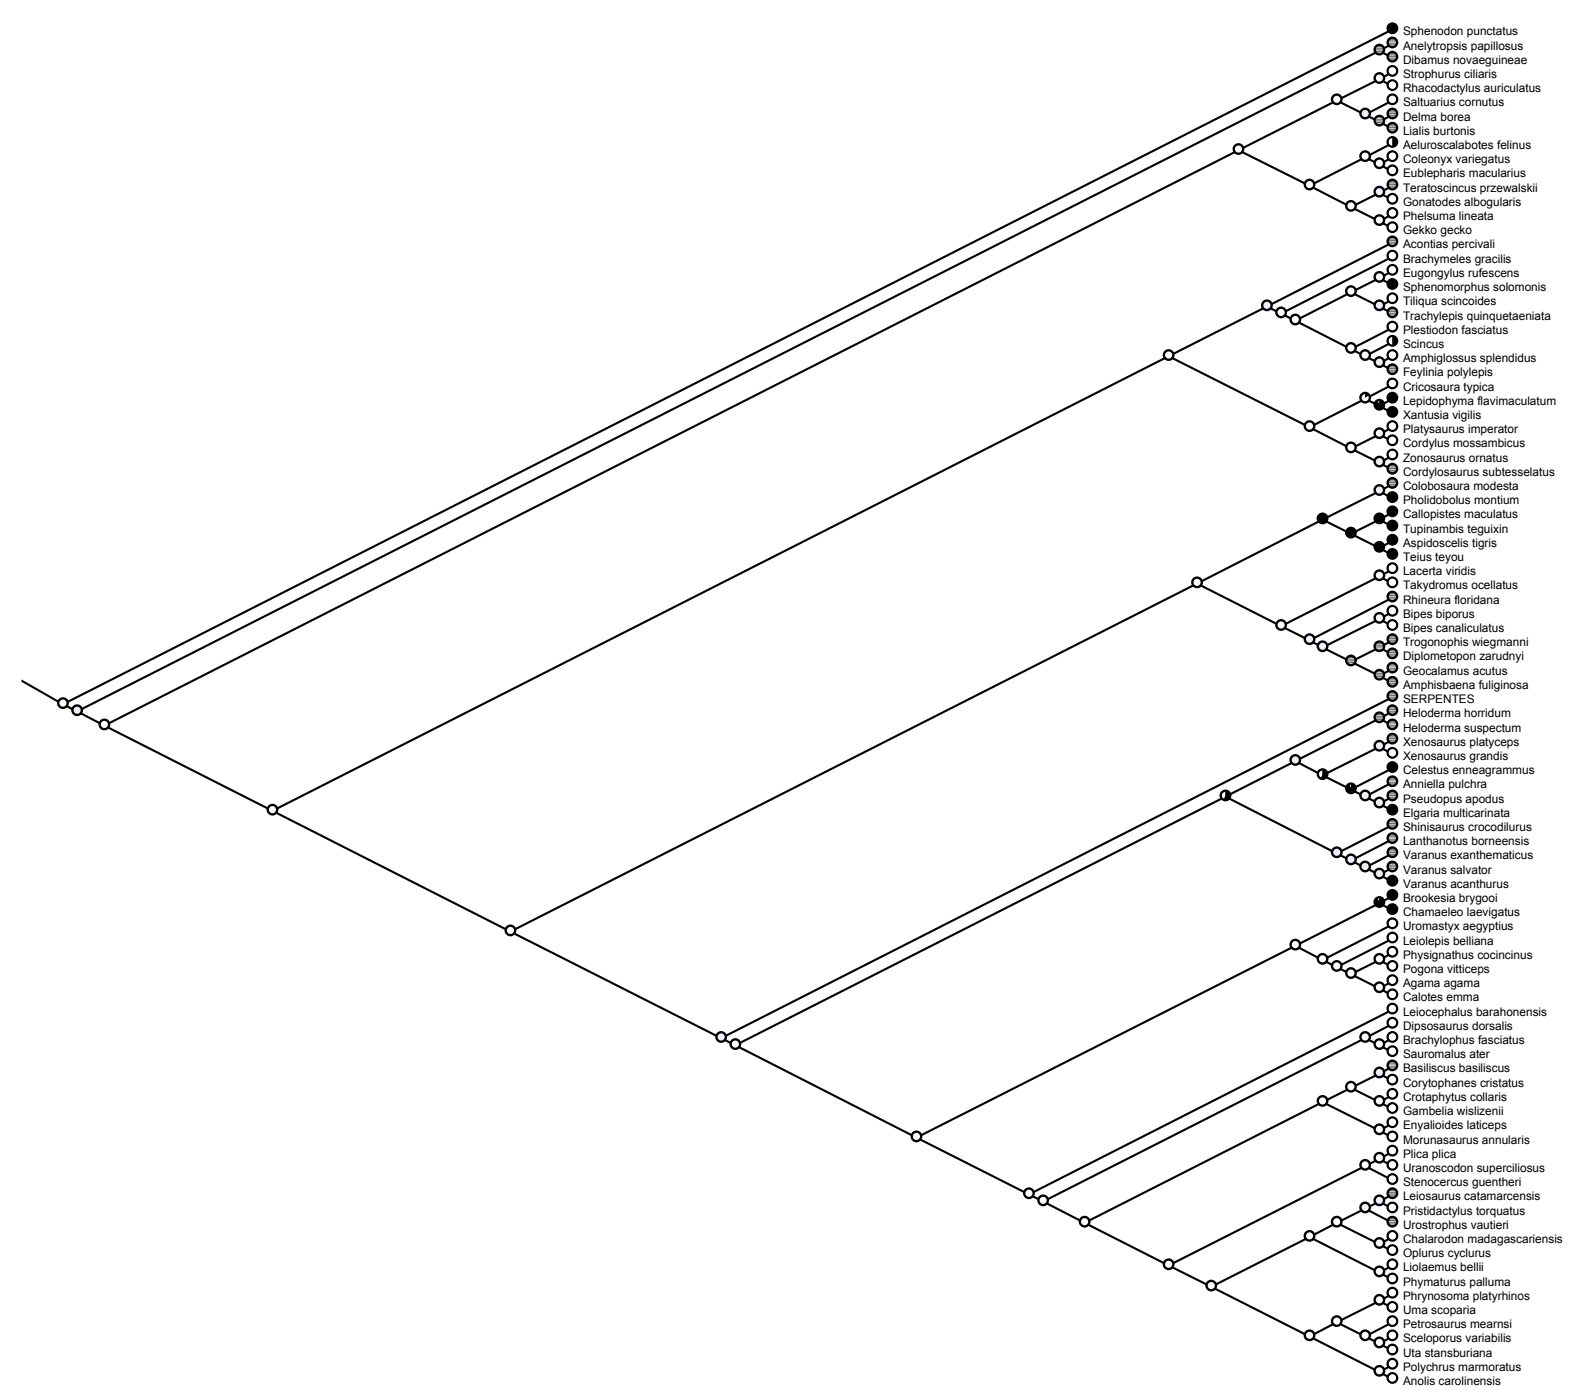

Character: Palmar sesamoids  
Maximum likelihood reconstruction

◻ 0 absent  
◼ 1 present

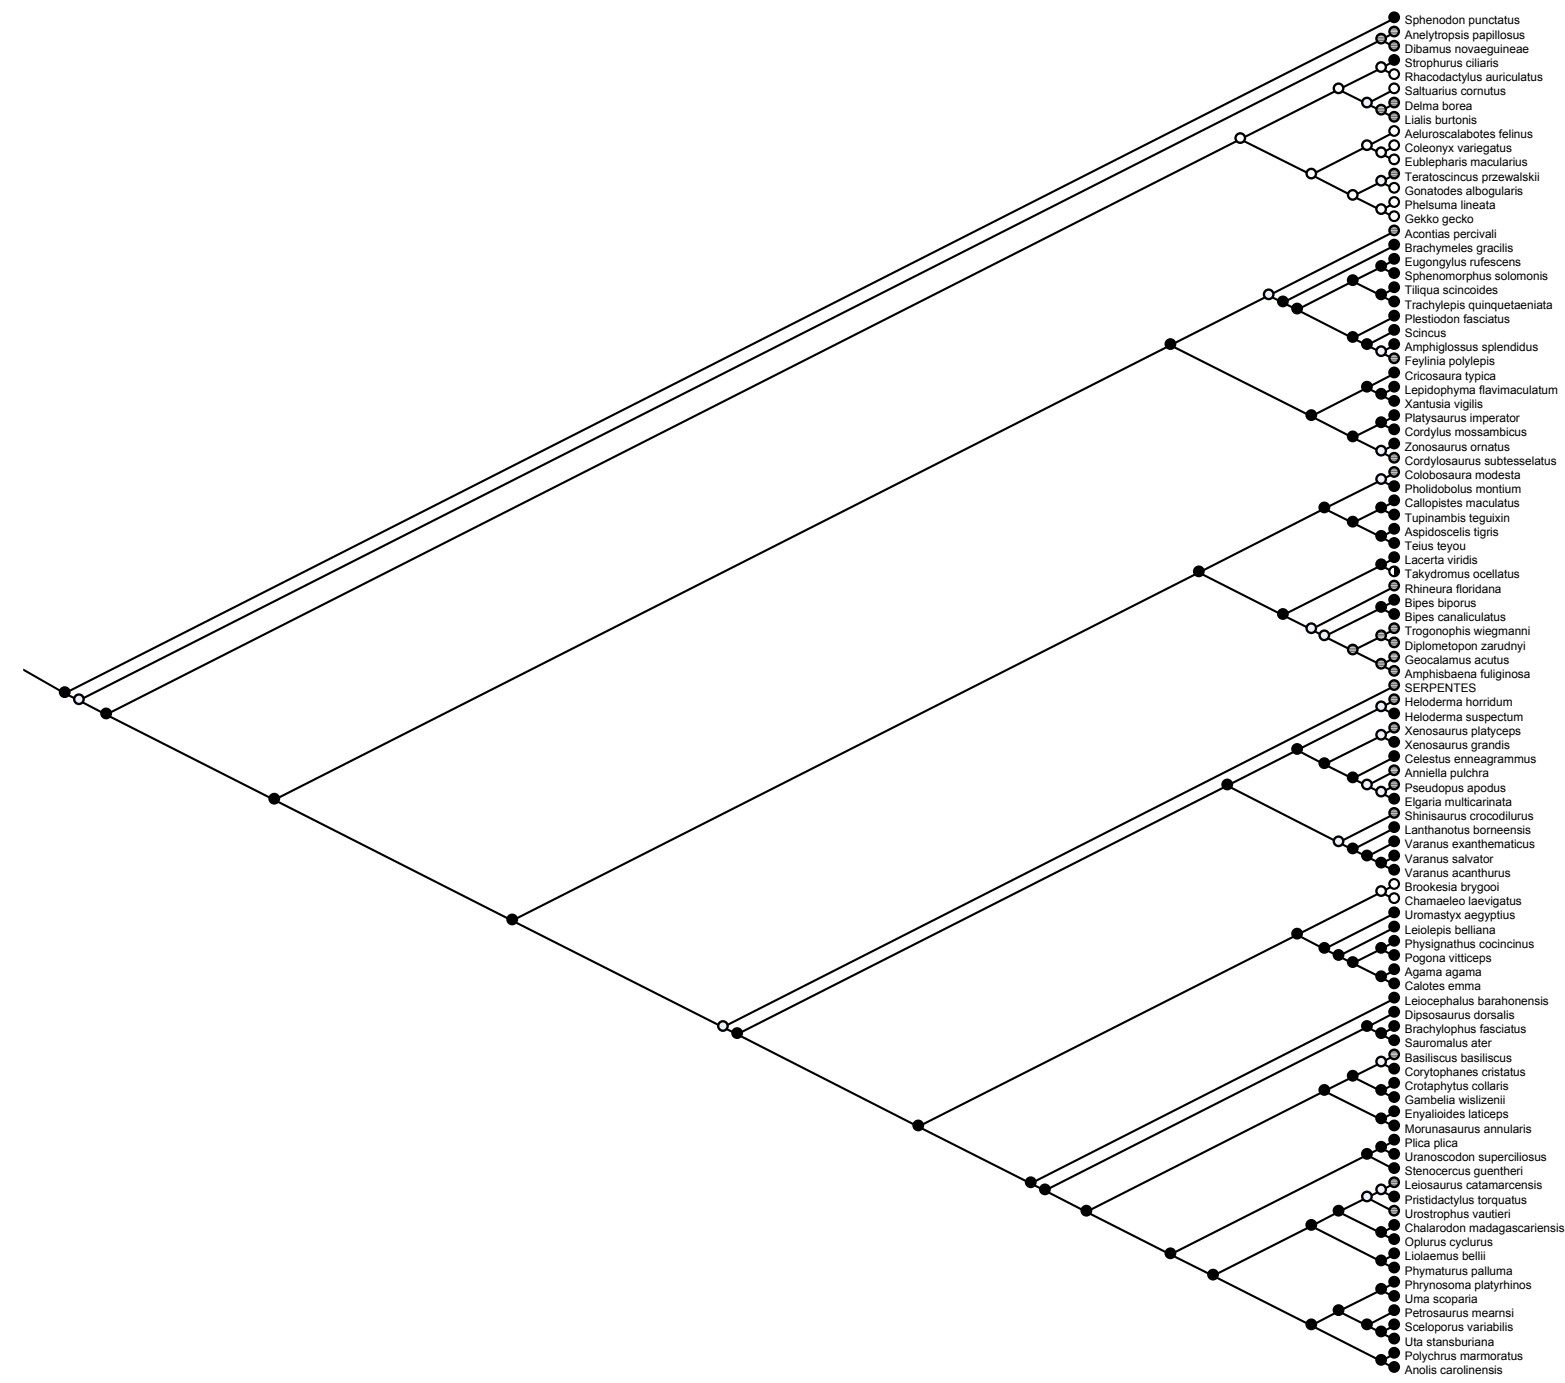

Character: Metacarpal sesamoids  
Maximum likelihood reconstruction

◻ 0 absent  
◼ 1 present

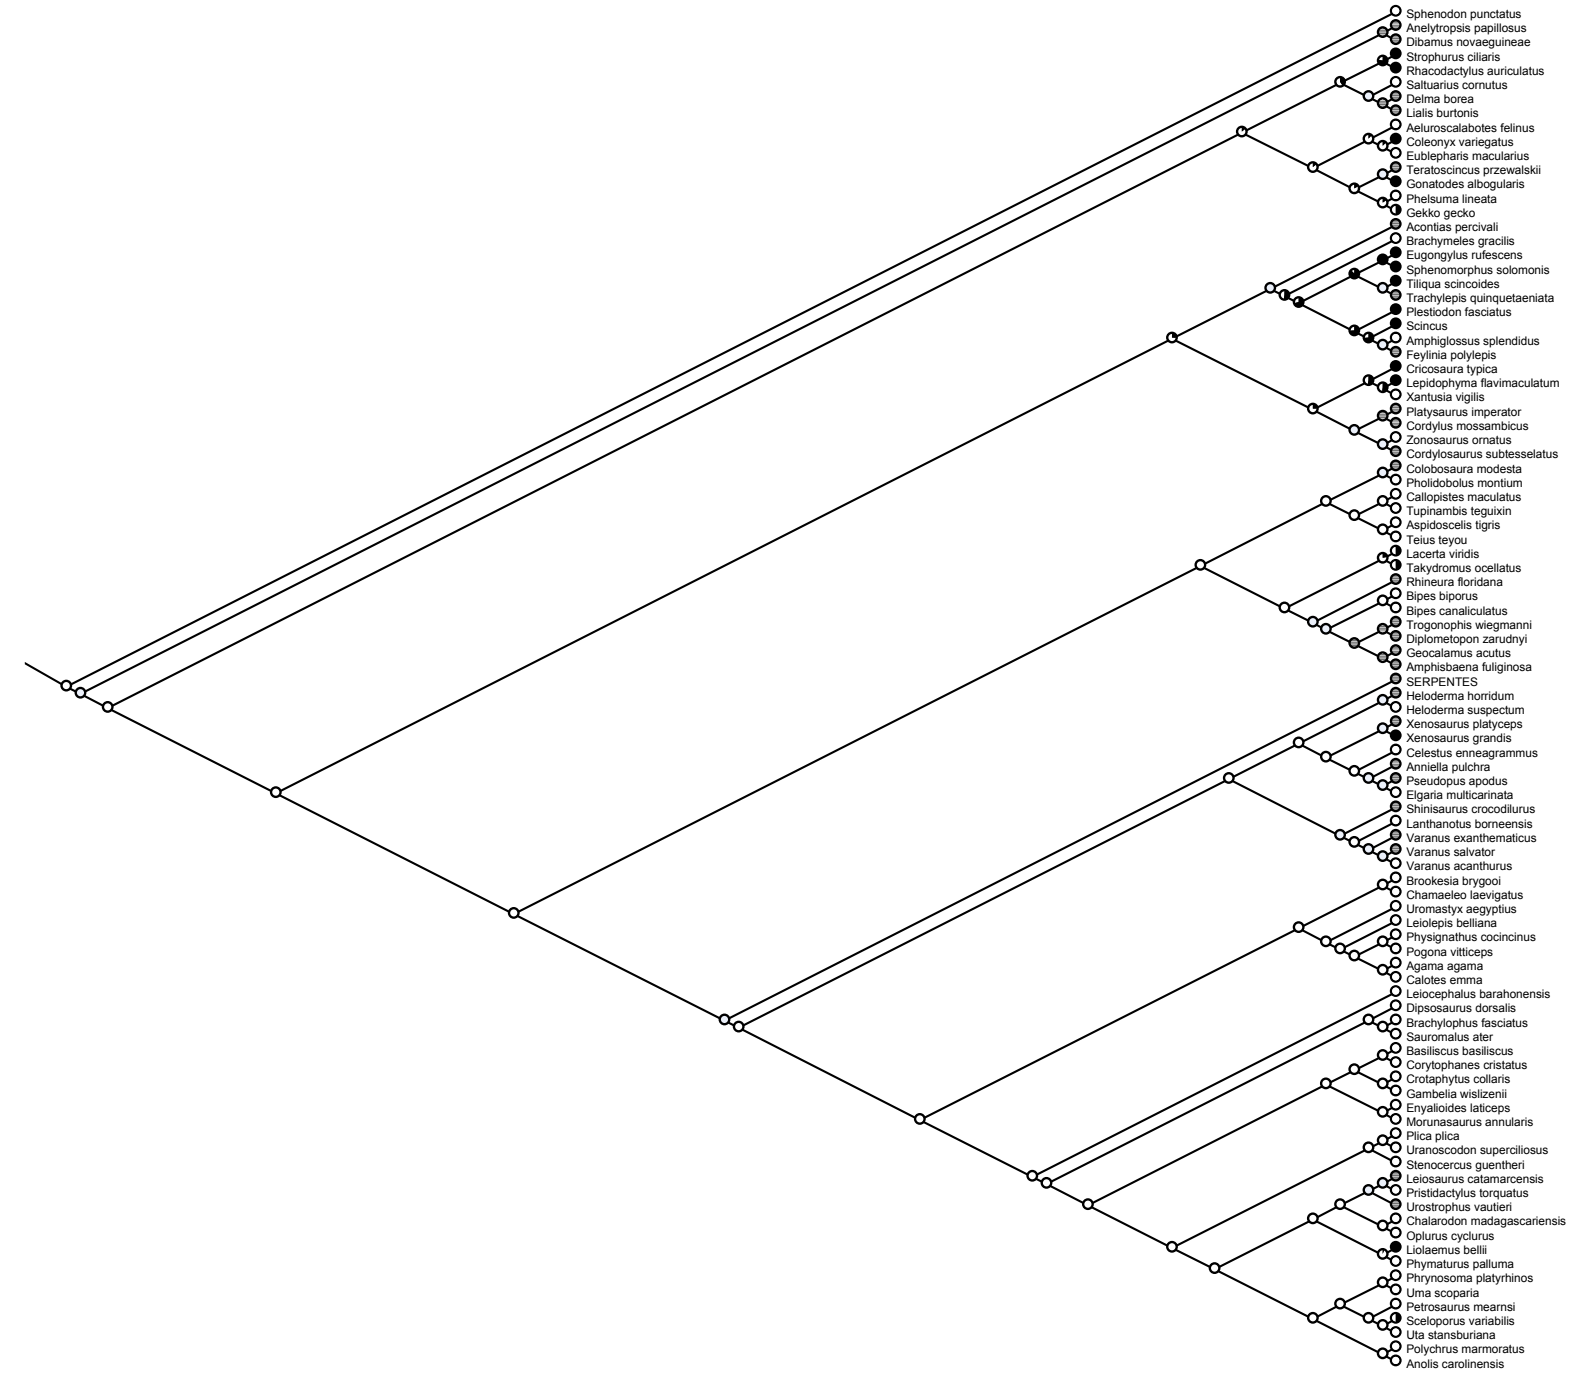

Character: Distal phalangeal sesamoids  
Maximum likelihood reconstruction

0 present  
1 absent

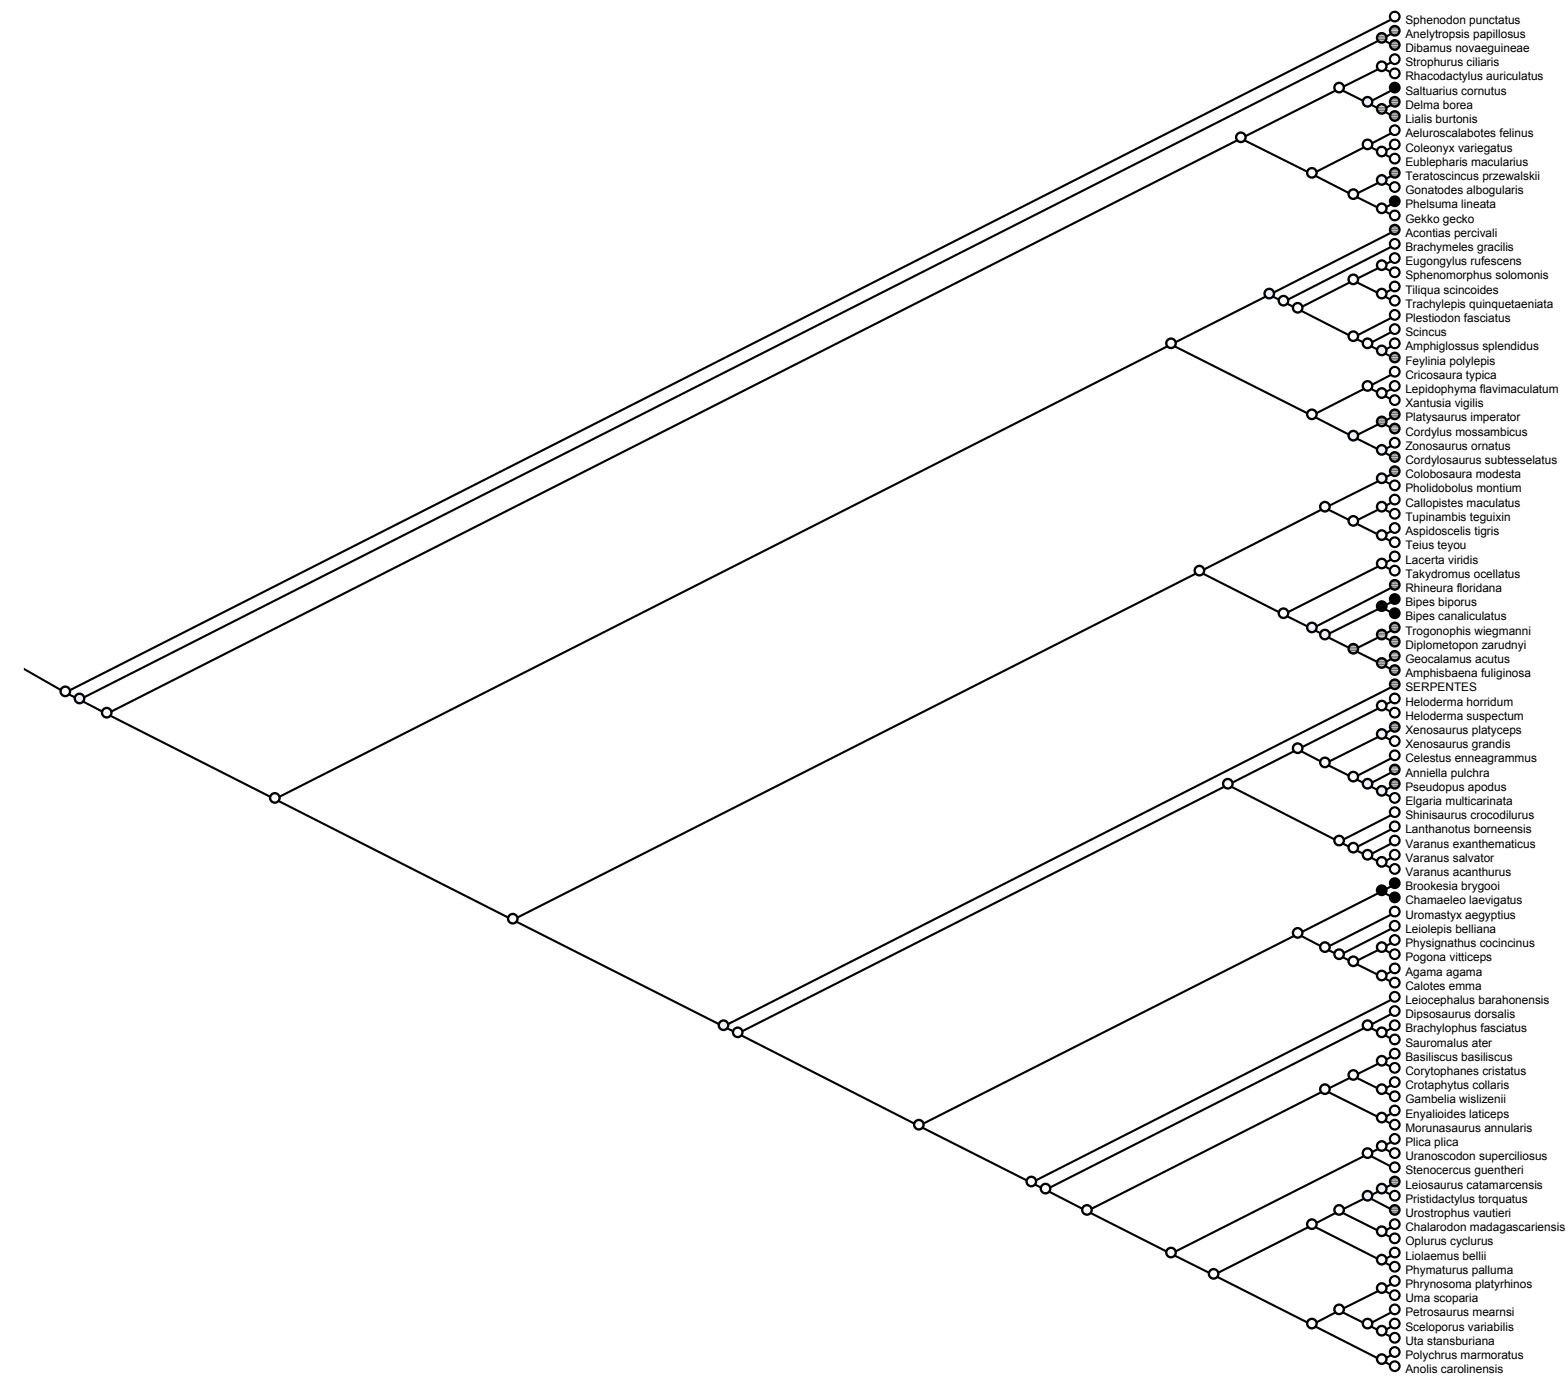

Character: Tibial patella  
Maximum likelihood reconstruction

◻ 0 present  
◼ 1 absent

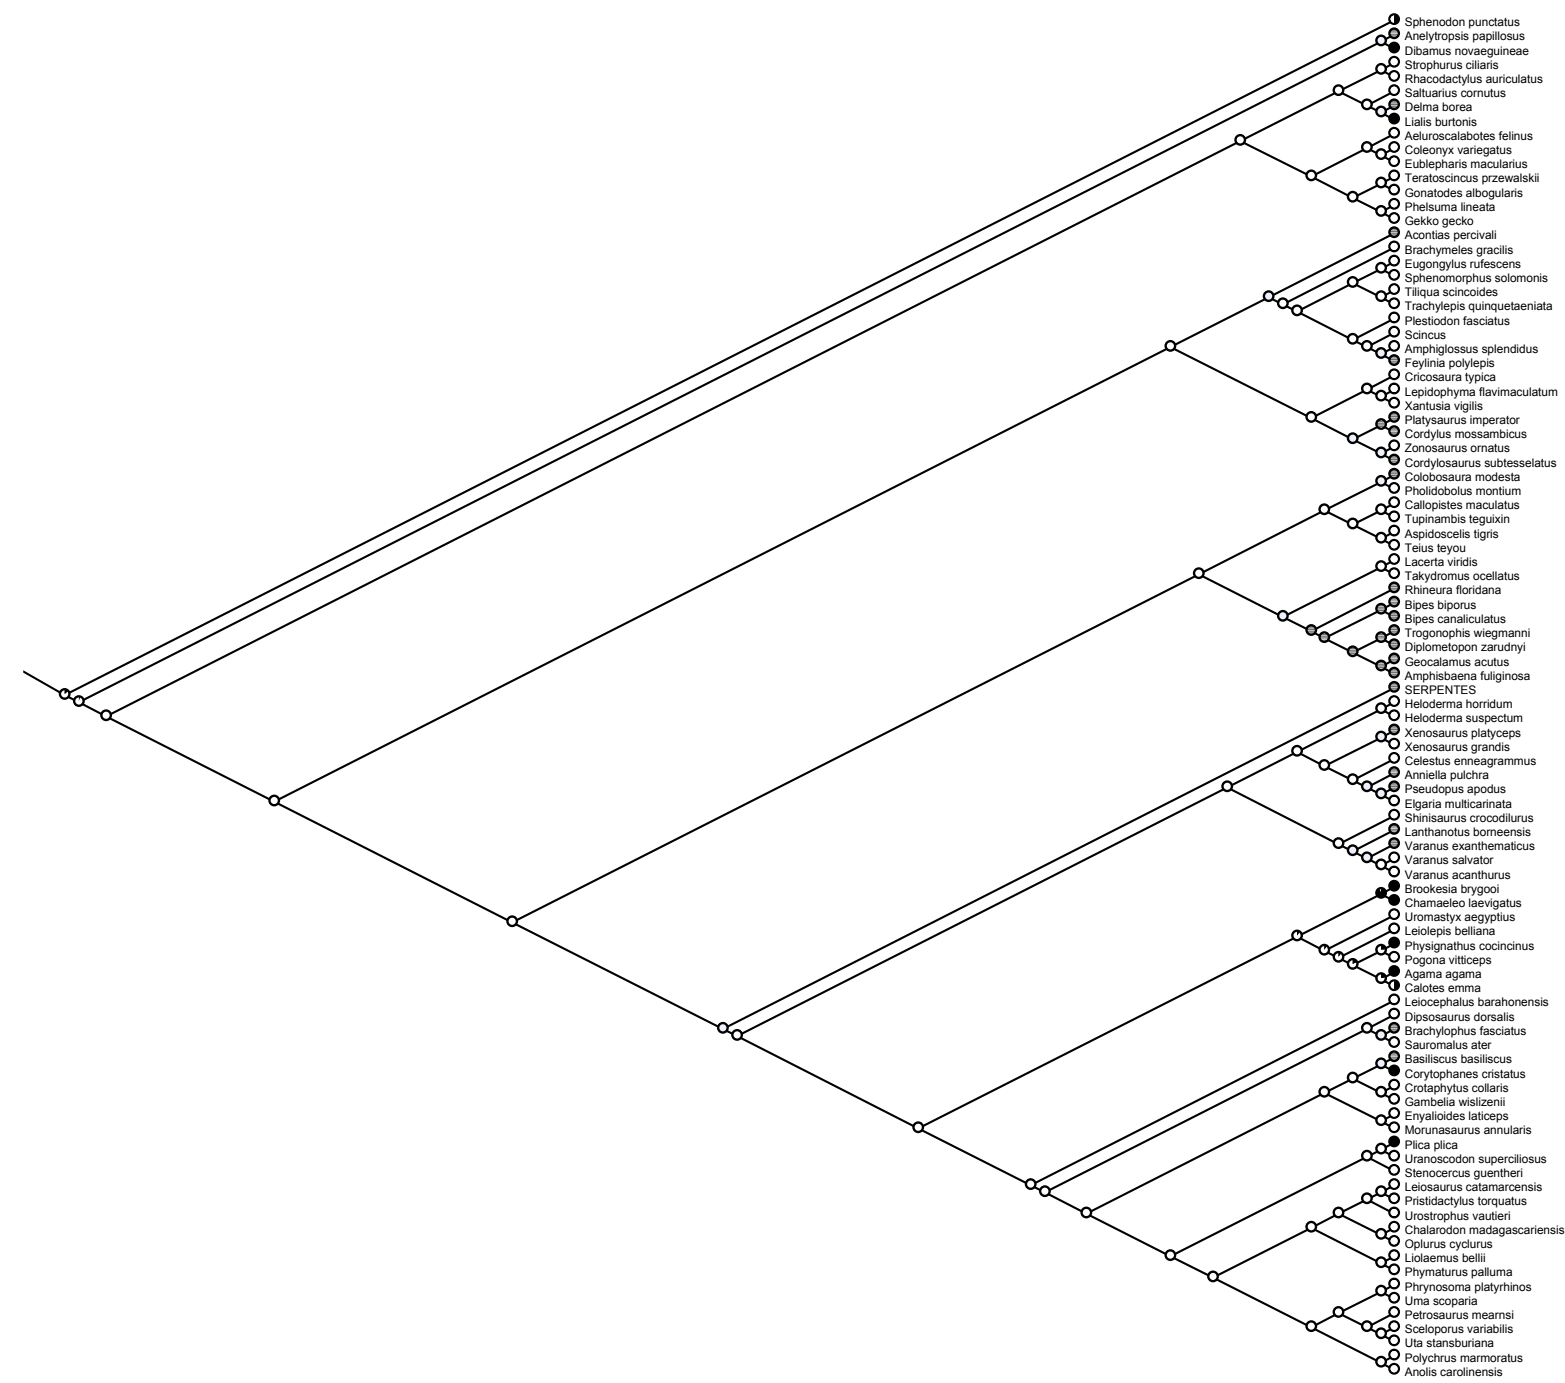

Character: Tibial lunula  
Maximum likelihood reconstruction

□ 0 present  
■ 1 absent

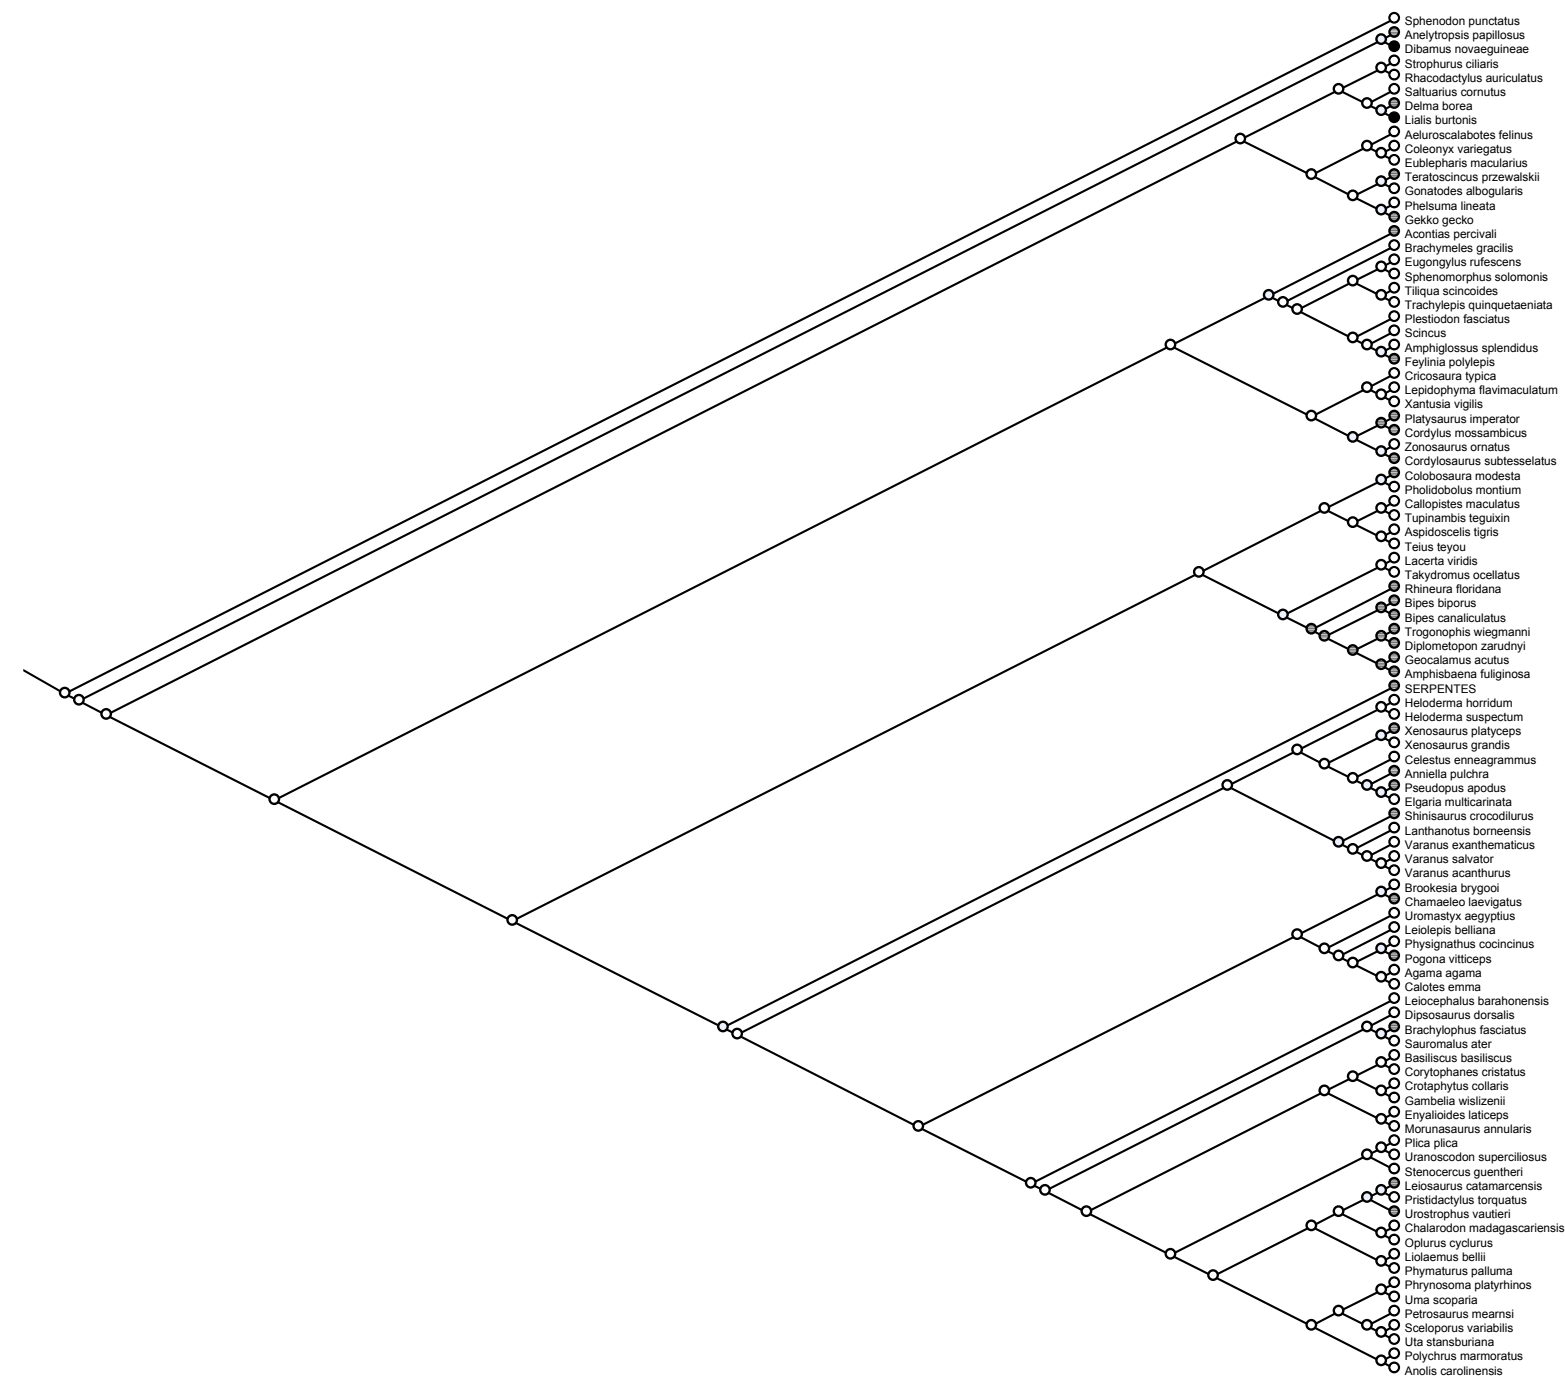



Character: Fibular lunula  
Maximum likelihood reconstruction

□ 0 present  
■ 1 absent

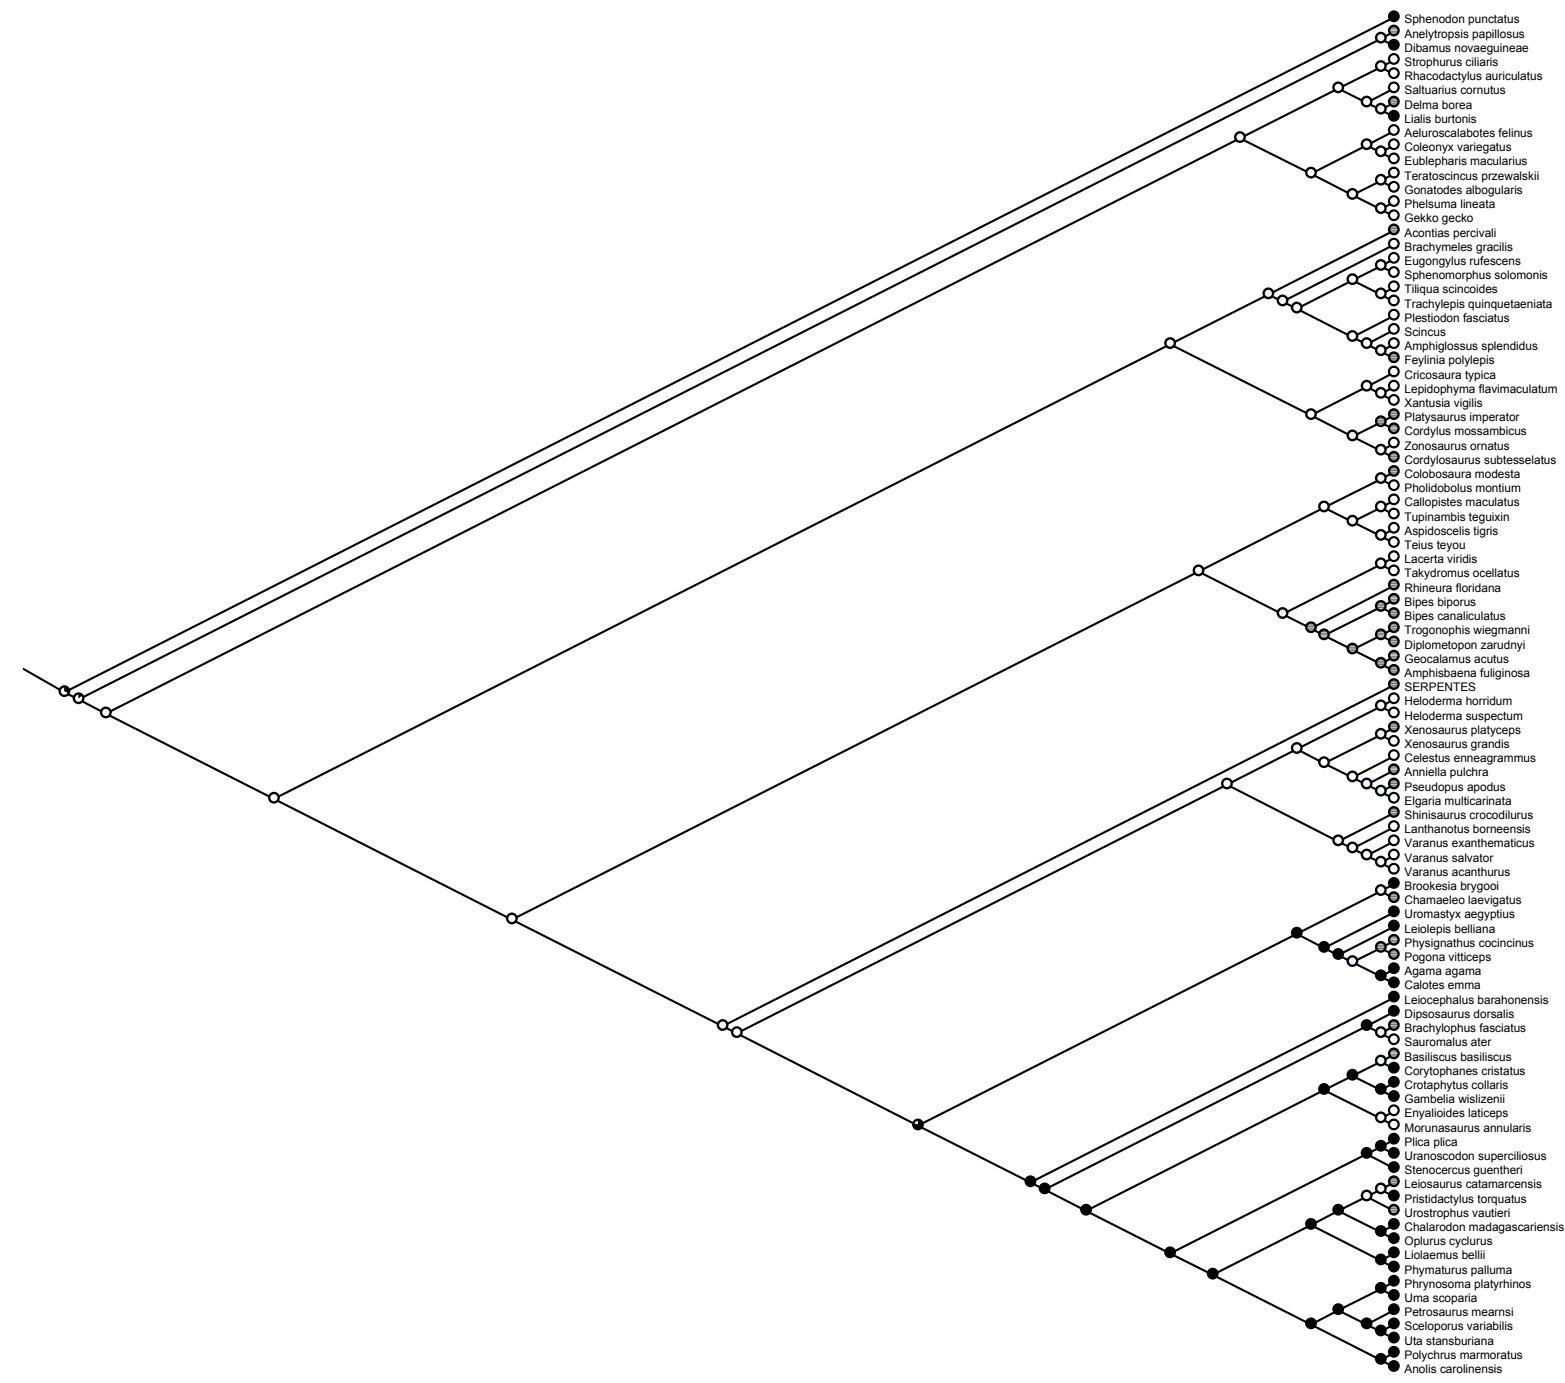

Character: Tibiofemoral lunulae  
 Maximum likelihood reconstruction

- 0 present and separate
- 1 ventral only
- 2 both absent
- 3 present and fused
- 4 dorsal only

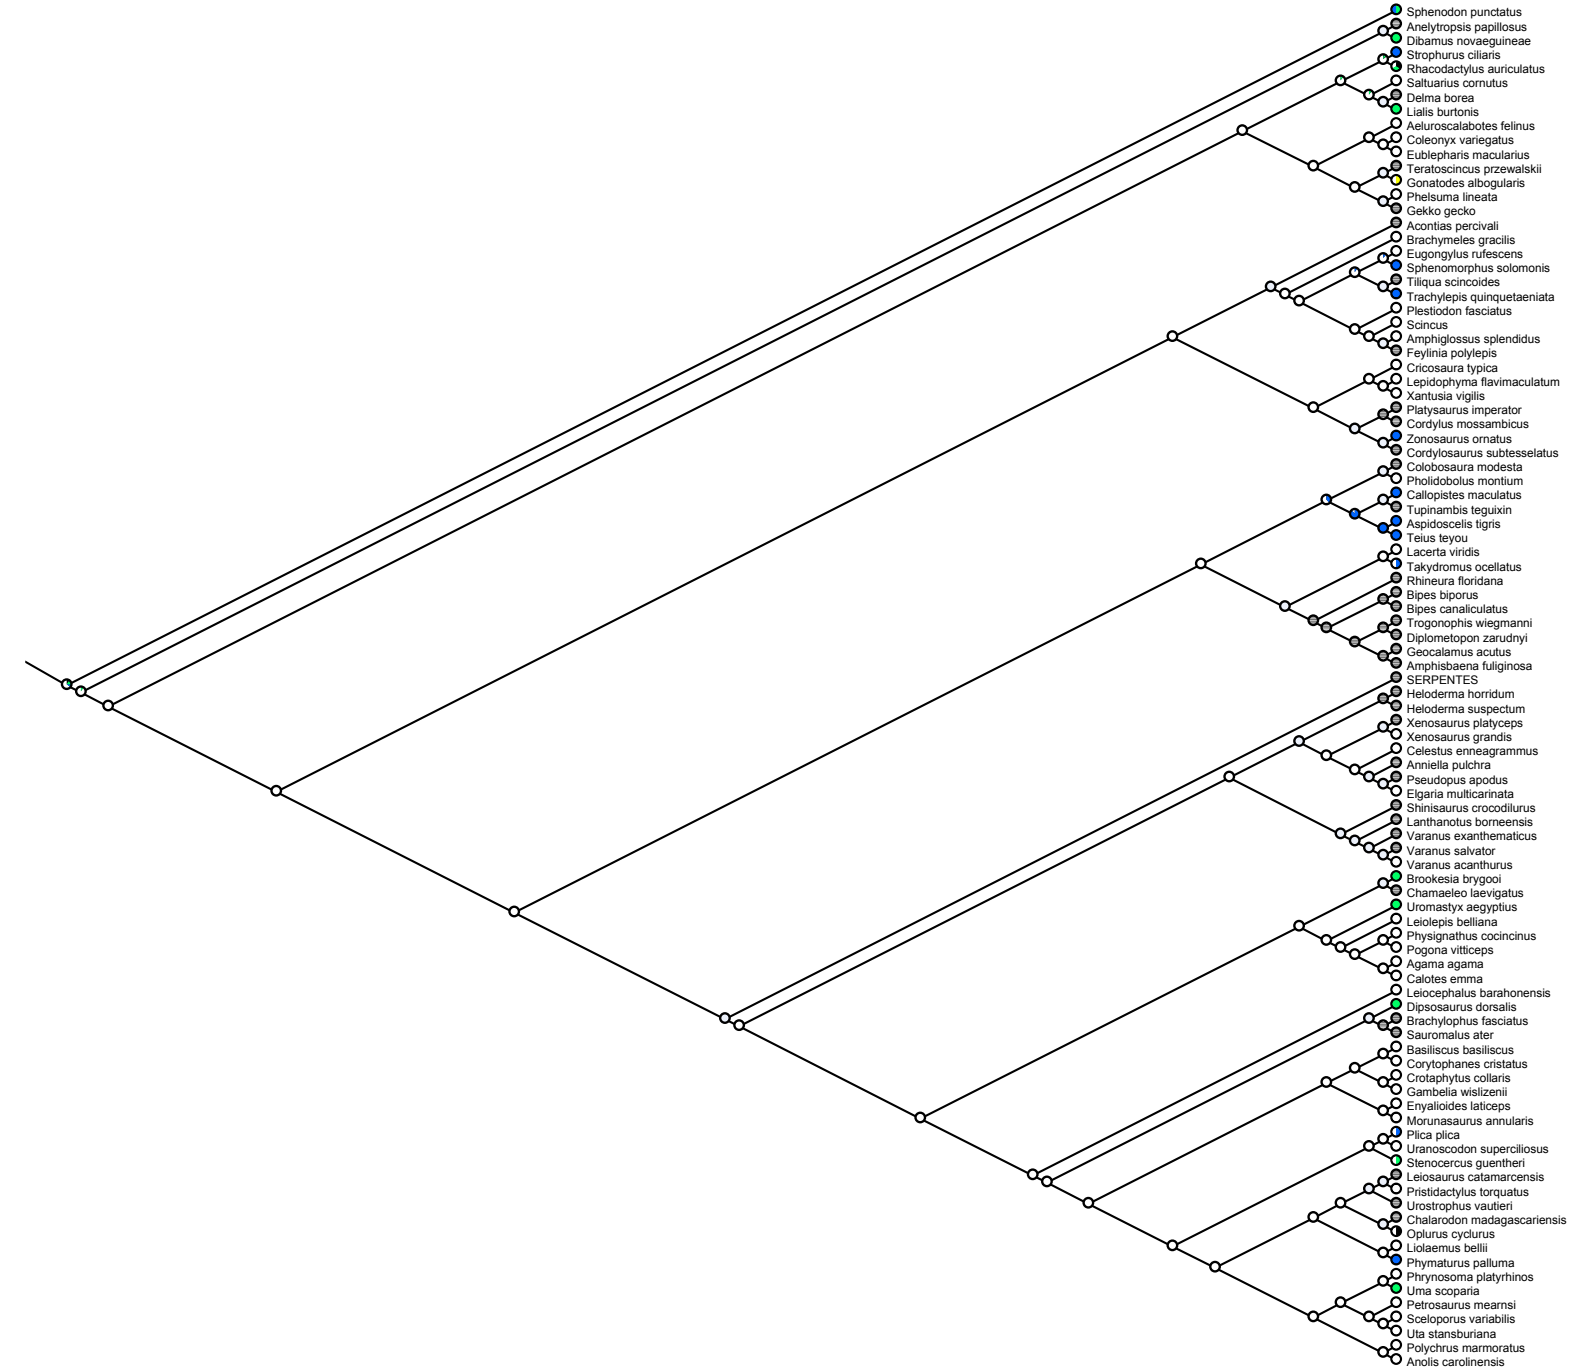

Character: AC-MTI sesamoid  
Maximum likelihood reconstruction

◻ 0 present  
◼ 1 absent

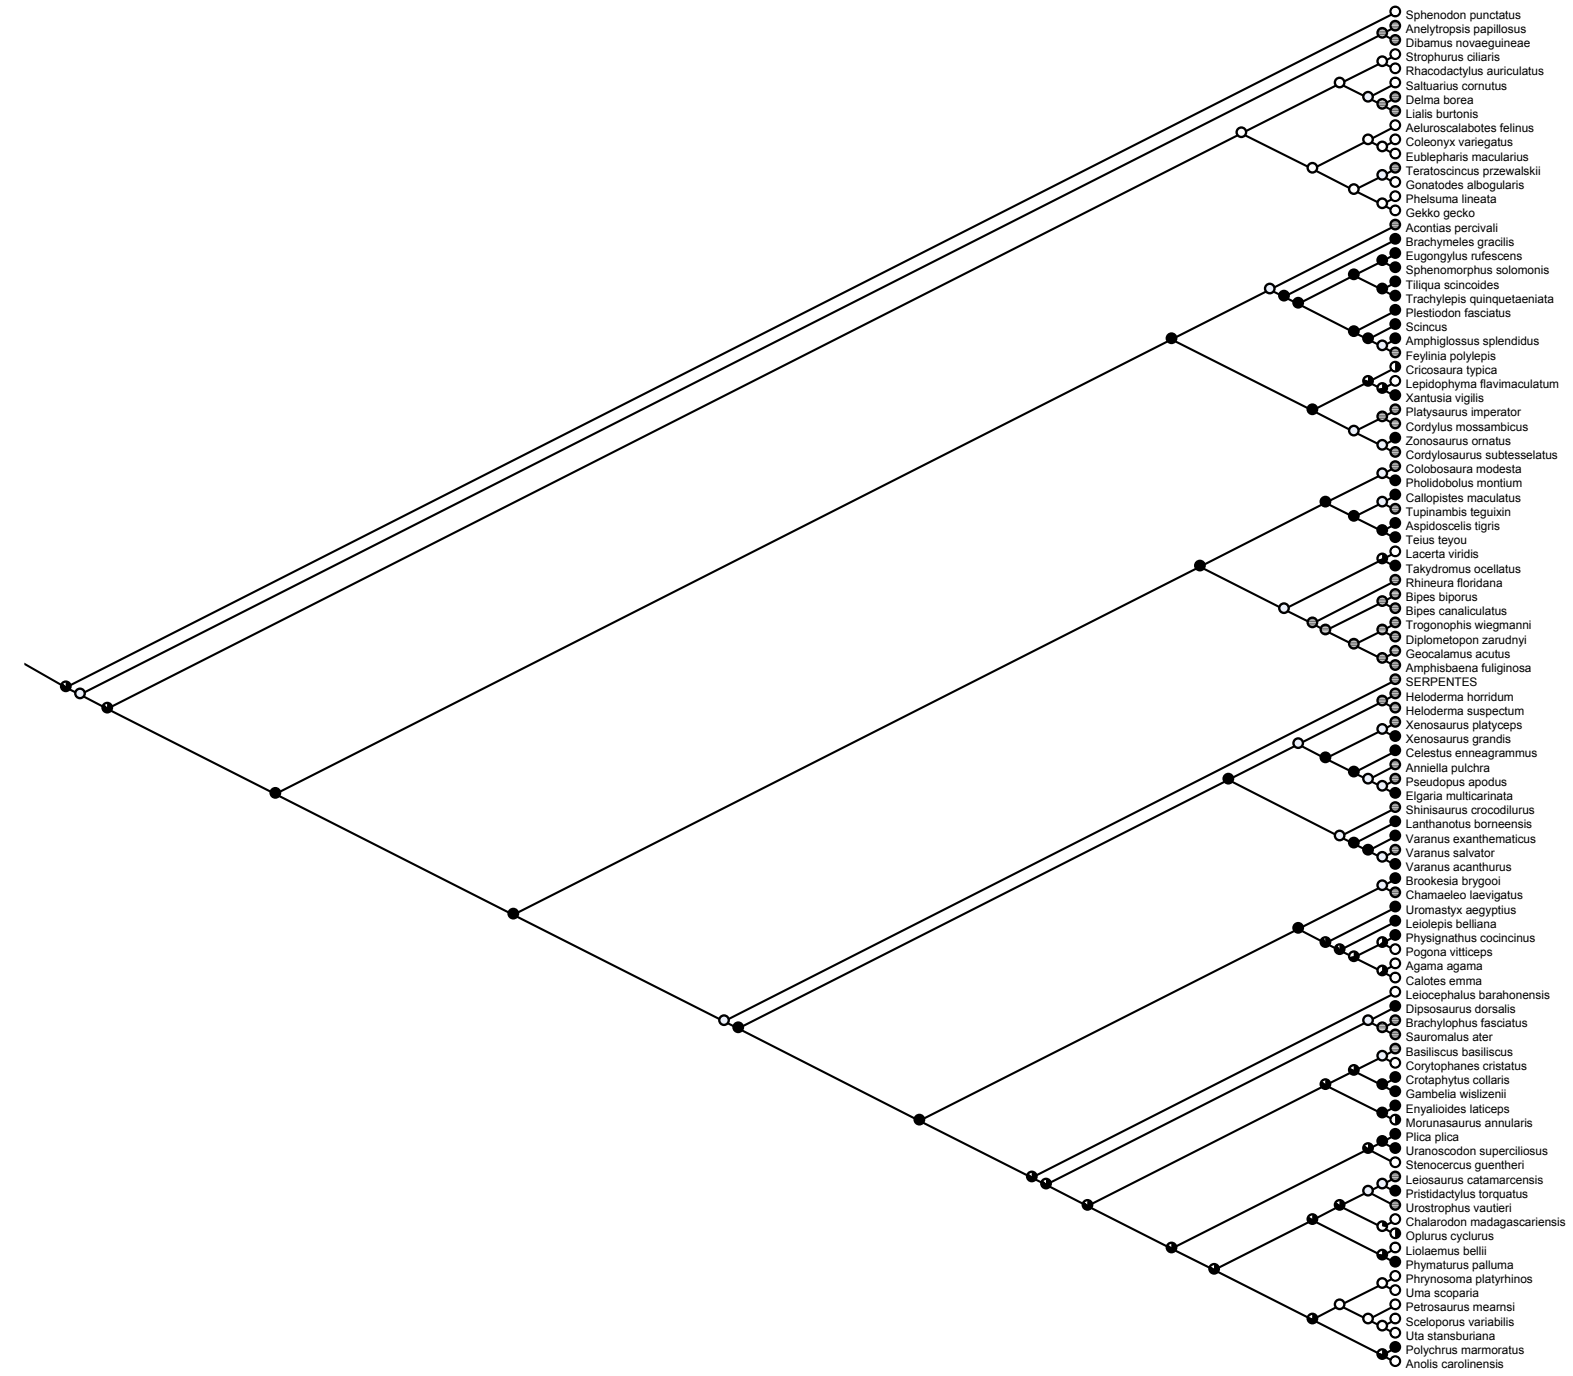

Character: Metatarsal sesamoids  
Maximum likelihood reconstruction

◻ 0 absent  
◼ 1 present

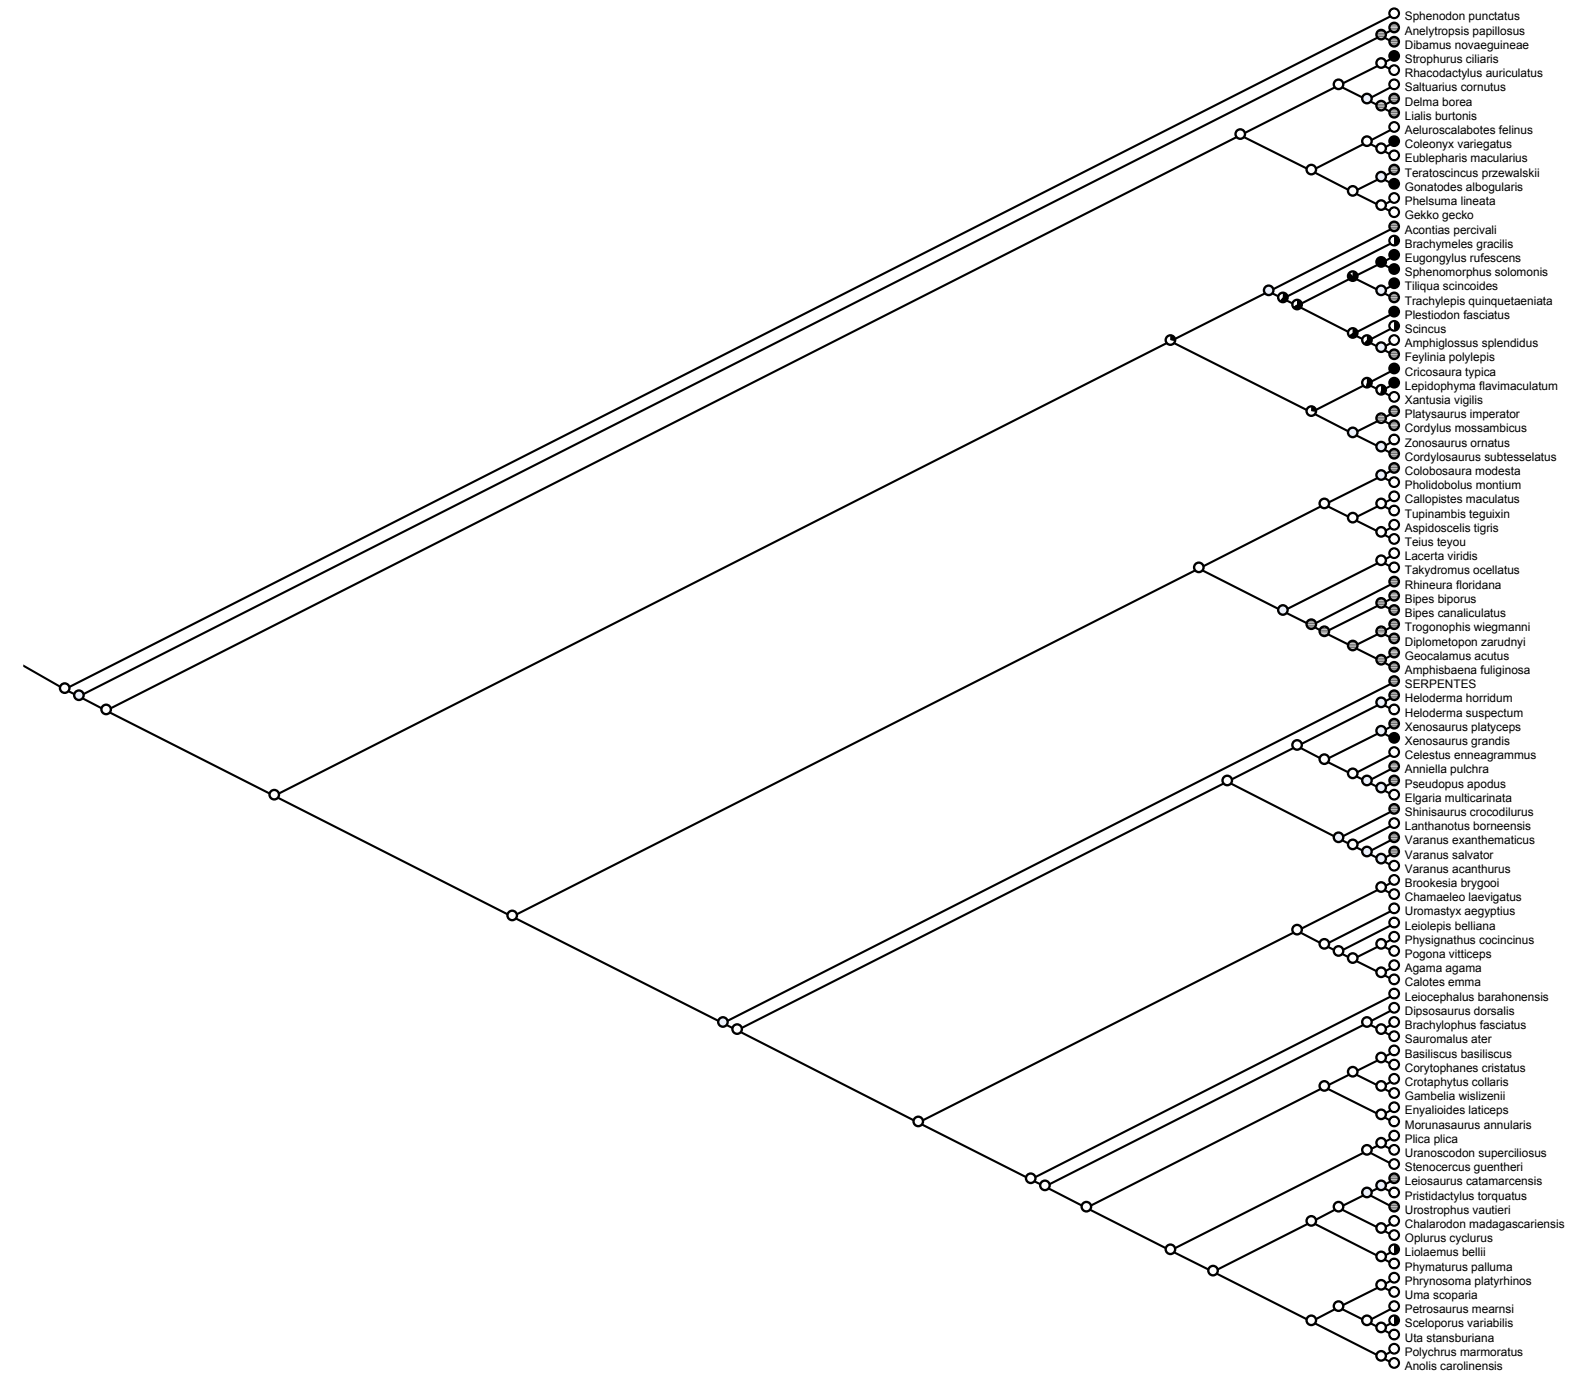

Character: Distal phalangeal sesamoids  
Maximum likelihood reconstruction

◻ 0 present  
◼ 1 absent

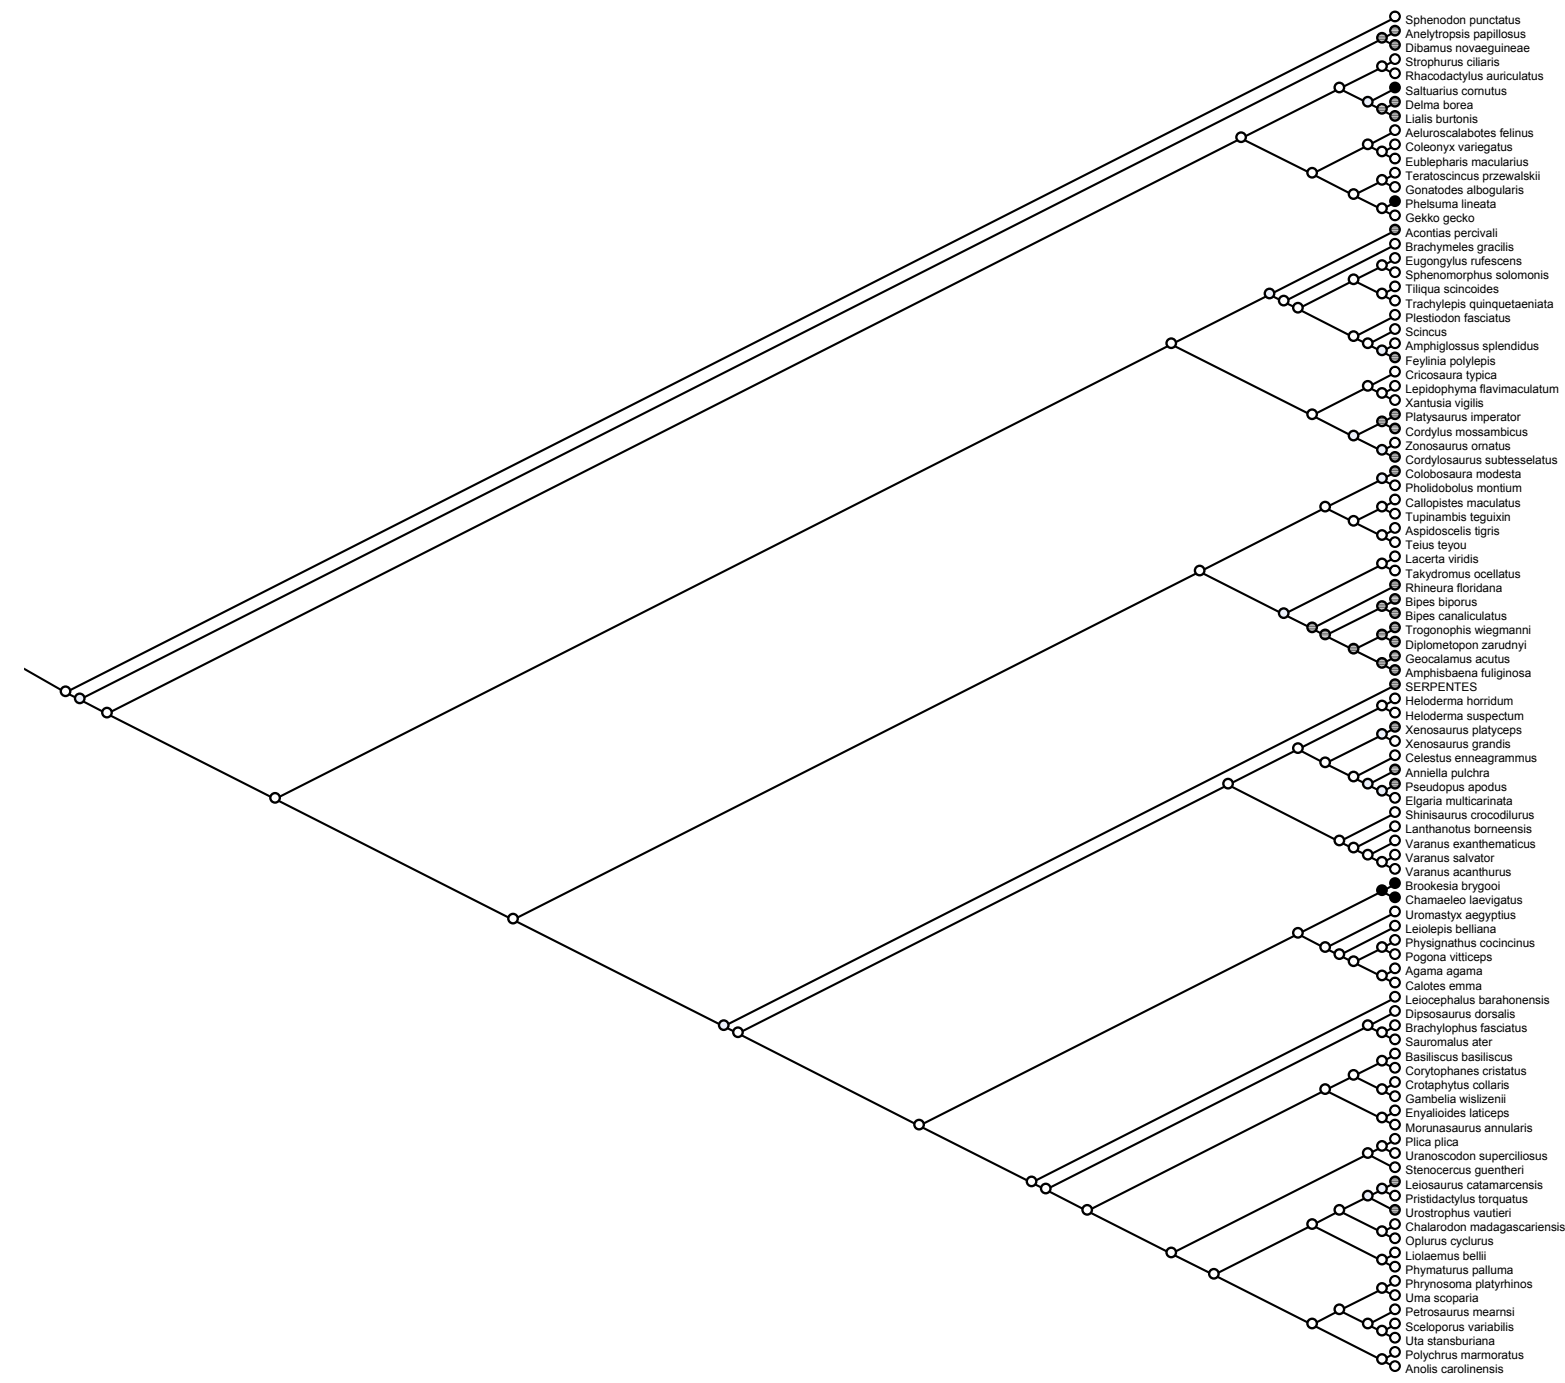

Supplement: JMOR-278-62-s003.pdf [file JMOR-278-62-s003.pdf]
